# Supplementary material for: Psychoeducational intervention for people at high risk of developing another melanoma: a pilot randomised controlled trial
Source: PubMed Central journal article supplement — BMJ Open. 2017 Oct 10;7(10):e015195. doi: 10.1136/bmjopen-2016-015195 (PMC5652456; doi:10.1136/bmjopen-2016-015195), 2017-10-10
Supplement: bmjopen-2016-015195.draft_revisions.pdf [file bmjopen-2016-015195.draft_revisions.pdf]

# BMJ Open

BMJ Open is committed to open peer review. As part of this commitment we make the peer review history of every article we publish publicly available.

When an article is published we post the peer reviewers' comments and the authors' responses online. We also post the versions of the paper that were used during peer review. These are the versions that the peer review comments apply to.

The versions of the paper that follow are the versions that were submitted during the peer review process. They are not the versions of record or the final published versions. They should not be cited or distributed as the published version of this manuscript.

BMJ Open is an open access journal and the full, final, typeset and author-corrected version of record of the manuscript is available on our site with no access controls, subscription charges or pay-per-view fees (<http://bmjopen.bmj.com>).

If you have any questions on BMJ Open's open peer review process please email [editorial.bmjopen@bmj.com](mailto:editorial.bmjopen@bmj.com)

# BMJ Open

## A psycho-educational intervention for people at high risk of developing another melanoma: A pilot randomised controlled trial

|                                 |                                                                                                                                                                                                                                                                                                                                                                                                                                                                                                                                                                                                                                                                                                                                                                                            |
|---------------------------------|--------------------------------------------------------------------------------------------------------------------------------------------------------------------------------------------------------------------------------------------------------------------------------------------------------------------------------------------------------------------------------------------------------------------------------------------------------------------------------------------------------------------------------------------------------------------------------------------------------------------------------------------------------------------------------------------------------------------------------------------------------------------------------------------|
| Journal:                        | <i>BMJ Open</i>                                                                                                                                                                                                                                                                                                                                                                                                                                                                                                                                                                                                                                                                                                                                                                            |
| Manuscript ID                   | bmjopen-2016-015195                                                                                                                                                                                                                                                                                                                                                                                                                                                                                                                                                                                                                                                                                                                                                                        |
| Article Type:                   | Research                                                                                                                                                                                                                                                                                                                                                                                                                                                                                                                                                                                                                                                                                                                                                                                   |
| Date Submitted by the Author:   | 21-Nov-2016                                                                                                                                                                                                                                                                                                                                                                                                                                                                                                                                                                                                                                                                                                                                                                                |
| Complete List of Authors:       | Dieng, Mbathio; The University of Sydney, Sydney Medical School<br>Kasparian, N; University of New South Wales, 2) Discipline of Paediatrics, School of Women's and Children's Health<br>Mireskandari, Shab; The university of Sydney, 3) Centre for Medical Psychology & Evidence-based Decision-making<br>Butow, Phyllis; university of sydney, School of Psychology<br>Costa, Daniel; The University of Sydney, Pain Management Research Institute<br>Morton, Rachael; The University of Sydney, NHMRC Clinical Trials Centre<br>Mann, Graham; University of Sydney, Western Clinical School, Westmead Millenium Institute<br>Menzies, Scott; The University of Sydney, Discipline of Dermatology, Sydney Medical School<br>Cust, Anne; The University of Sydney, Sydney Medical School |
| <b>Primary Subject Heading</b>: | Oncology                                                                                                                                                                                                                                                                                                                                                                                                                                                                                                                                                                                                                                                                                                                                                                                   |
| Secondary Subject Heading:      | Public health, Qualitative research, Mental health, Oncology                                                                                                                                                                                                                                                                                                                                                                                                                                                                                                                                                                                                                                                                                                                               |
| Keywords:                       | melanoma, psycho-education, pilot study, cancer, supportive care, Feasibility                                                                                                                                                                                                                                                                                                                                                                                                                                                                                                                                                                                                                                                                                                              |
|                                 |                                                                                                                                                                                                                                                                                                                                                                                                                                                                                                                                                                                                                                                                                                                                                                                            |

SCHOLARONE™  
Manuscripts

**TITLE: A psycho-educational intervention for people at high risk of developing another melanoma: A pilot randomised controlled trial**

Authors: Dieng M<sup>1</sup>, Kasparian NA<sup>2\*</sup>, Mireskandari S<sup>3</sup>, Butow P<sup>4</sup>, Costa DSJ<sup>5</sup>, Morton RL<sup>6</sup>, Mann GJ<sup>7,8</sup>, Menzies S<sup>9,10</sup>, Cust AE<sup>1,7\*</sup>

- 1) *Cancer Epidemiology and Prevention Research, Sydney School of Public Health, The University of Sydney, NSW, Australia.*
- 2) *Discipline of Paediatrics, School of Women's and Children's Health, UNSW Medicine, The University of New South Wales, Sydney, NSW, Australia.*
- 3) *Centre for Medical Psychology & Evidence-based Decision-making, The University of Sydney, NSW, Australia*
- 4) *Psycho-oncology Co-operative Research Group, School of Psychology, University of Sydney, NSW, Australia.*
- 5) *Pain Management Research Institute, University of Sydney at Royal North Shore Hospital, St Leonards, NSW, Australia*
- 6) *NHMRC Clinical Trials Centre, University of Sydney, Camperdown, NSW, Australia*
- 7) *Centre for Cancer Research, Westmead Institute for Medical Research, University of Sydney, Westmead, Australia*
- 8) *Melanoma Institute Australia, University of Sydney, North Sydney, Australia*
- 9) *Discipline of Dermatology, Sydney Medical School, The University of Sydney*
- 10) *The Sydney Melanoma Diagnostic Centre, Royal Prince Alfred Hospital, Camperdown, NSW, Australia*

*\*Cust AE and Kasparian NA contributed equally to this work and share senior authorship on this paper.*

**Email addresses:**

Mbathio Dieng: [mbathio.dieng@sydney.edu.au](mailto:mbathio.dieng@sydney.edu.au)  
Nadine A Kasparian: [n.kasparian@unsw.edu.au](mailto:n.kasparian@unsw.edu.au)  
Shab Mireskandari: [Shab.mireskandari@sydney.edu.au](mailto:Shab.mireskandari@sydney.edu.au)  
Phyllis Butow: [phyllis.butow@sydney.edu.au](mailto:phyllis.butow@sydney.edu.au)  
Daniel SJ Costa: [Daniel.costa@sydney.edu.au](mailto:Daniel.costa@sydney.edu.au)  
Rachael L Morton: [Rachael.morton@ctc.usyd.edu.au](mailto:Rachael.morton@ctc.usyd.edu.au)  
Graham J Mann: [graham.mann@sydney.edu.au](mailto:graham.mann@sydney.edu.au)  
Scott Menzies: [scott.menzies@sswahs.nsw.gov.au](mailto:scott.menzies@sswahs.nsw.gov.au)  
Anne E Cust: [anne.cust@sydney.edu.au](mailto:anne.cust@sydney.edu.au)

**Corresponding author at:**

Mbathio Dieng

Cancer Epidemiology and Prevention Research

The Lifehouse, Level 6 North, 119-143 Missenden Road

Camperdown NSW 2050

Australia

Tel: +61 28 627 1538

[mbathio.dieng@sydney.edu.au](mailto:mbathio.dieng@sydney.edu.au)

For peer review only

## ABSTRACT

**Introduction:** Information and psychological needs have been reported as ones of the greatest areas of unmet needs for melanoma patients. To respond to these needs, we developed the *Melanoma Care Intervention* a developed psycho-educational intervention for people at high risk of developing another melanoma comprising of a newly developed melanoma educational booklet and individually tailored telephone support sessions provided by trained psychologists. The purpose of this study was to investigate the acceptability, feasibility, and preliminary outcomes of the *Melanoma Care Intervention*.

**Methods:** Twenty-four adults (14 men, 10 women, mean age: 58 years, SD:12.2) at high risk of developing a subsequent primary melanoma were recruited and randomly assigned 1:1 to the intervention (a psycho-educational booklet, a Cancer Council booklet on melanoma, and up to five telephone-based sessions with a psychologist) or usual care (Cancer Council booklet only). Acceptability, feasibility, fear of cancer recurrence and secondary psychosocial outcomes were assessed at baseline, one and six months.

**Results:** Satisfaction and perceived benefits were rated highly for all intervention components, particularly the telephone-based psychology sessions (mean satisfaction and benefits: both 9.27 out of 10, SD=2.41). Preliminary outcome data suggested beneficial changes in fear of recurrence, depression, anxiety, stress, melanoma-related knowledge, and satisfaction with dermatological care.

**Conclusions:** The intervention was feasible, acceptable, and potentially effective in improving psychological adjustment. Timely access to effective, evidence-based, psychological care is a recognised need for people with melanoma. The intervention is designed to directly address this need in a way that is feasible in a clinical setting, acceptable to patients and health professionals.

1  
2  
3 **Keywords:** Melanoma; psycho-education; pilot study; supportive care; feasibility; cancer;  
4  
5 psychological stress.  
6

7 **Trial registration number:** The trial was registered with the Australian and New Zealand  
8  
9 Clinical Trials Registry on 19/03/2013 (Registration Number: ACTRN12613000304730).  
10  
11

### 12 13 14 **Strengths and limitations of this study**

- 15 • This is the first completed pilot study to show that education and psychological  
16 support to patients before and after dermatological appointments in a high risk clinical  
17 setting was feasible, acceptable and well received.  
18  
19
- 20 • Documenting feasibility and identifying challenges encountered provides information  
21 that can be useful in the planning and implementation of innovative efforts to improve  
22 the psychological well-being of people with melanoma. The results of this trial  
23 highlight important processes in the development and delivery of psycho-educational  
24 interventions to melanoma patients.  
25  
26
- 27 • We used a mixed-methods design to demonstrate the feasibility, acceptability and to  
28 highlight the areas of improvement for the larger trial.  
29  
30
- 31 • As this was a small pilot study with a limited sample, our findings do not have  
32 statistical significance, but the positive feedback from participants and the direction of  
33 outcomes support wider testing of the intervention.  
34  
35  
36  
37  
38  
39  
40  
41  
42  
43  
44  
45  
46  
47  
48  
49  
50  
51  
52  
53  
54  
55  
56  
57  
58  
59  
60

## Background

Early detection and appropriate clinical management of melanoma ensures that most people with the disease have a good prognosis, with about 90% of patients still alive five years after diagnosis.<sup>1</sup> Despite this good prognosis, melanoma survivors have an ongoing threat of recurrence and are recommended to carry out regular skin self-examinations, have regular clinical skin examinations, and undertake behavioural changes to minimise excessive sun exposure;<sup>2</sup> all of which can add to the psychological burden of melanoma.<sup>3</sup> In addition, people with melanoma often experience intense fear that the disease could spread and become untreatable. Studies have reported that 30-50% of melanoma survivors experience heightened emotional distress,<sup>2</sup> and that many report unmet needs for information and psychological support.<sup>4-6</sup> Australian clinical practice guidelines for the management of melanoma highly recommended that psycho-educational support be made widely available to people with melanoma.<sup>7</sup> German guidelines extend this by recommending implementation of regular psycho-oncological screening to identify and offer psychological care to people with melanoma experiencing difficulties adjusting to their disease.<sup>8</sup> Several psycho-educational interventions for melanoma patients have been reported in the literature, with beneficial outcomes.<sup>9</sup> In a systematic review of 16 interventions, McLoone et al. concluded that participation in psychological interventions resulted in lower anxiety, health-related distress and melanoma recurrence rates, and positive changes in coping with illness.<sup>9</sup>

People at high-risk of a subsequent melanoma are particularly vulnerable to distress. Seventy-five percent of high-risk melanoma survivors report persistent fear and uncertainty about the possibility of developing new disease, cancer recurrence or metastases.<sup>3,10</sup> Despite this, psychological support is not currently offered in Australian high-risk clinics that provide a specialised clinical service for people at very high-risk of primary melanoma,<sup>11</sup> nor have specific interventions been designed for this high-risk sub-group. To address this gap, our

1  
2  
3 team developed a multifaceted psychological care program for people at high-risk of  
4  
5 developing another primary melanoma (the *Melanoma Care Study*).<sup>12</sup> The intervention is  
6  
7 comprised of up to five individual, telephone-based sessions with a psychologist, combined  
8  
9 with an evidence-based psycho-educational booklet designed to respond to the unmet  
10  
11 supportive care needs of people who have had melanoma.  
12  
13

14 This pilot study had three aims: (1) evaluate the acceptability of, and participant  
15  
16 satisfaction with, the *Melanoma Care Study*; (2) determine the feasibility of delivering  
17  
18 telephone-based psychology sessions scheduled in relation to dermatological appointments at  
19  
20 melanoma high-risk clinics; and (3) collect preliminary outcome data for a range of health-  
21  
22 related outcomes, including: fear of cancer recurrence, depression, anxiety, stress, unmet  
23  
24 supportive care needs, satisfaction with clinical care, melanoma-related knowledge,  
25  
26 behavioural adjustment to melanoma risk, and health-related quality of life.  
27  
28  
29  
30  
31

## 32 **Methods**

### 33 *Study design and participants*

34  
35 A randomised controlled trial design was used to pilot the *Melanoma Care Study*. Participants  
36  
37 were recruited from three melanoma high-risk clinics in New South Wales, Australia; two  
38  
39 situated in inner-city Sydney and one in a regional coastal city. These high-risk clinics  
40  
41 provide a specialised clinical service for people at very high-risk of primary melanoma,<sup>11</sup>  
42  
43 including people with a previous melanoma and either a strong family history of melanoma,  
44  
45 many moles (i.e. dysplastic naevus syndrome), or a history of multiple primary melanomas.  
46  
47 People aged 18 years or older with a history of stage 0, I or II melanoma were identified from  
48  
49 the clinic databases and invited to participate. People were ineligible if they were identified  
50  
51 as high-risk but had never had melanoma (e.g. people who carry a high penetrance genetic  
52  
53 mutation); or had a known history of severe major depression, psychotic illness or other  
54  
55  
56  
57  
58  
59  
60



1  
2  
3 serious psychiatric condition or cognitive deficit, or were unable to participate in English.  
4  
5 Active stage III melanoma or metastatic melanoma (stage IV) were excluded as they have  
6  
7 different psychosocial needs to stage 0/I/II patients, where the melanoma has been confined  
8  
9 to a primary tumour only.  
10  
11 Ethics approval was obtained from all relevant ethics committees. Informed consent was  
12  
13 obtained from all participants prior to study participation.  
14  
15

### 16 17 18 *Intervention Arm* 19

20  
21 The *Melanoma Care Study* had three components: 1) a newly developed psycho-educational  
22  
23 booklet in full colour hardcopy, 2) a freely available Cancer Council booklet, and 3) up to  
24  
25 five telephone-based sessions with a psychologist specifically trained to deliver the  
26  
27 intervention according to protocol. The psycho-educational booklet, *Melanoma: Questions*  
28  
29 *and Answers* was developed by a multidisciplinary team and is comprised of seven modules  
30  
31 and a series of tailored resources: (1) types of melanoma, melanoma diagnosis, and treatment;  
32  
33 (2) factors that may contribute to melanoma risk; (3) information on skin self-examination,  
34  
35 vitamin D and sun protection, as well as question prompts for communication with one's  
36  
37 health care team; (4) emotional and social aspects of melanoma; (5) strategies to assist people  
38  
39 in coping well with melanoma risk; (6) resources to assist people in keeping track of their  
40  
41 melanoma care; and (7) sources for further information and support. The booklet content and  
42  
43 format was pilot tested and revised on the basis of feedback from 19 people with melanoma  
44  
45 and 10 health professionals.  
46  
47  
48

49  
50 The Cancer Council booklet, *Understanding Melanoma* is comprised of easy-to-read  
51  
52 information about melanoma diagnosis, treatment, and emotional and practical issues. The  
53  
54 Cancer Council booklet is heavily focused on diagnosis and treatment information while the  
55  
56 psycho-educational booklet, *Melanoma Questions and Answers* provides more in-depth  
57  
58  
59  
60

1  
2  
3 information about emotional and behavioural aspects of coping with melanoma,  
4  
5 communicating with one's family and health care team, and managing one's melanoma care.  
6

7  
8 Participants in the intervention group were also offered five telephone-based sessions  
9  
10 with a psychologist, tailored to the needs of each individual participant and designed to  
11  
12 provide *patient-specific* care to address identified difficulties, needs, concerns and goals. The  
13  
14 first three sessions were in close connection to their next full dermatological consultation at  
15  
16 the melanoma high-risk clinic and the next two sessions were in close connection with their  
17  
18 subsequent high-risk clinic appointment approximately six months later. Participants who  
19  
20 were not able to identify specific difficulties, needs or goals were offered the option of  
21  
22 limiting their participation to the first three sessions. The telephone-based sessions were  
23  
24 underpinned by the core principles of brief psychodynamically-oriented psychotherapy.<sup>13-15</sup>  
25  
26 The goal of the sessions was to provide empathic, active listening at a deep level so as to try  
27  
28 to understand participants and their experiences, and to assist participants in developing  
29  
30 healthy emotional, cognitive and behavioural coping responses.<sup>16</sup> Psychosocial care planning  
31  
32 and referrals for further information, support and clinical care were also provided, as  
33  
34 appropriate. A manual was developed by a team of psycho-oncologists with extensive  
35  
36 experience in the care of people with melanoma (NK, SM, PB), to guide the psychologists  
37  
38 providing the intervention on a session-by-session basis (see Supplementary Table 1). The  
39  
40 psychologists followed the general principles outlined in the manual, whilst tailoring the  
41  
42 intervention to the specific circumstances, needs, goals and characteristics of individual  
43  
44 participants. The psychologists were trained and did also received weekly supervision by one  
45  
46 of the senior author (NK).  
47  
48  
49  
50

51  
52  
53 *Control Arm*  
54  
55  
56  
57  
58  
59  
60

1  
2  
3 Participants in the control arm received usual care, which consisted of their usual melanoma  
4 high-risk clinic appointments and a copy of the Cancer Council booklet. A blank notepad was  
5 also included in the study package in order to keep the size of the package consistent with  
6 that received by the intervention group.  
7  
8  
9  
10

### 11 *Procedures*

12  
13 Baseline data were collected using paper- or web-based questionnaires, as preferred by  
14 participants. Participants were then randomised to the intervention or control arm using  
15 minimisation and stratification by high-risk clinic, using an independent telephone  
16 randomisation service at the National Health and Medical Research Council Clinical Trials  
17 Centre, The University of Sydney.  
18  
19  
20  
21  
22  
23  
24

25  
26 Participants in the intervention arm received the intervention over a one-month period  
27 (if receiving three telephone-based psychology sessions) or a six-month period (if receiving  
28 five sessions). Both the psycho-educational and Cancer Council booklets were sent to  
29 participants two weeks before their usual six-monthly high-risk clinic appointment, at which  
30 a complete dermatological examination was undertaken. For people who received three  
31 sessions, these occurred one week before, one week after, and three weeks after this clinic  
32 appointment. People who received five sessions participated in two additional sessions; the  
33 fourth occurred one week before their subsequent high-risk clinic appointment and the fifth  
34 occurred the following week. Two psychologists received extensive training in intervention  
35 delivery prior to trial commencement.<sup>12</sup> With participants' permission, all sessions were  
36 audio-taped and early sessions were reviewed by the clinical psychology supervisor (NK),  
37 who also provided weekly supervision during which sessions were discussed in-depth.  
38  
39  
40  
41  
42  
43  
44  
45  
46  
47  
48  
49  
50  
51  
52  
53  
54  
55  
56  
57  
58  
59  
60

Participants randomised to the control arm received the Cancer Council booklet two weeks before their six-monthly high-risk clinic appointment.

## Measures

Perceptions of the newly developed intervention and usual care were evaluated using the following purposely-designed items:

1. *Intervention acceptability and perceived benefits.* Six months after study enrolment, intervention participants rated their satisfaction with, and perceived benefit of, the psychology sessions, the psycho-educational booklet and the Cancer Council booklet, while control participants rated the Cancer Council booklet only. Participants also indicated any behavioural changes they experienced following their participation in the study (e.g., find the emotional support to cope with melanoma, talk more openly with my doctor at the high-risk clinic), using a 5-point scale from “strongly agree” to “strongly disagree”. Participants in both arms rated the overall quality of the information and support received, and if they would recommend the intervention to other melanoma patients. Participants were also provided space to provide qualitative feedback if they wishes.
2. *Participants’ preferences.* Participants were offered a choice in the number of sessions (between three and five) they would engage in. Data on participants’ preferences, as well as the duration and timing of sessions were collected to inform the most feasible model upon which to design a larger trial.
3. *Adherence to intervention guidelines.* The proportion of participants who attended the telephone-based psychology sessions was recorded, as well as the number of sessions attended.
4. *Feasibility issues.* Difficulties, barriers, and resources associated with intervention implementation were also systematically recorded by the psychologists and the research team throughout the pilot.

1  
2  
3  
4  
5 *Preliminary outcome measures:* Outcomes relating to potential intervention efficacy were  
6  
7 also assessed by self-report questionnaire at baseline, 1- and 6-month follow-up. The primary  
8  
9 outcome was fear of cancer recurrence, measured using the Fear of Cancer Recurrence  
10  
11 Inventory (FCRI)<sup>17</sup> severity subscale. Secondary outcomes were depression, anxiety, stress,  
12  
13 satisfaction with melanoma care, behavioural adjustment to melanoma risk (skin self-  
14  
15 examination, sun exposure, sun protection), unmet supportive care needs, melanoma-related  
16  
17 knowledge, and health-related quality of life (see Supplementary Table 2).  
18  
19

20  
21 *Demographic and medical characteristics:* At baseline, age, gender, education level, marital  
22  
23 status, number of children were assessed. Health literacy was also assessed using two  
24  
25 validated items.<sup>18,19</sup> Medical characteristics (e.g. number of melanomas, stage of each  
26  
27 melanoma at diagnosis, time since first and last melanoma, melanoma treatment) were  
28  
29 collected from medical records.  
30  
31

### 32 33 34 35 *Statistical analysis*

36  
37 Descriptive statistics were used to summarise sample characteristics, feasibility, and  
38  
39 preliminary outcomes. Being a pilot study, the small sample precluded use of inferential  
40  
41 statistics; thus, mean scores and standard deviations (including the standardised mean  
42  
43 difference at each time point as a measure of effect size) were used to compare groups.  
44  
45 Questionnaires were scored according to standard published procedures and all analyses were  
46  
47 performed using SAS v9.3 (SAS Institute, Cary, North Carolina, USA).  
48  
49  
50  
51  
52  
53  
54  
55  
56  
57  
58  
59  
60

## Results

### *Sample characteristics*

Twelve participants were randomly assigned to the treatment arm and 12 to the control (Table 1). One intervention participant withdrew from the study after one psychology session, as he felt the intervention would not benefit him. The intervention group comprised eight men and four women, with a mean age of 57 years ( $SD=14$ ), and a median melanoma Breslow thickness of 0.78mm (range 0.3-2.95mm). The control group comprised six men and six women, with a mean age of 61 years ( $SD=14$ ), and a median Breslow thickness of 1.3mm (range 0.3-3.5mm). For both groups, superficial spreading melanoma was the most common histopathological subtype.

### *Acceptability*

Four out of eleven participants in the intervention group reported reading the psycho-educational booklet, *Melanoma: Questions and Answers*, from 'cover to cover', 1/11 'quite thoroughly', 4/11 'only for parts they found relevant', and 1/11 'briefly'. The Cancer Council booklet was read from 'cover to cover' by 3/11 intervention participants versus 2/12 control participants; 'quite thoroughly' (2/11 versus 4/12); only for parts they found relevant (4/11 versus 3/12) and 'briefly' (2/11 versus 3/12). Ratings for different components of the intervention are shown in Table 2.

### *Satisfaction*

Intervention participants rated the intervention highly in terms of perceived satisfaction and benefits, particularly the psychology sessions (perceived satisfaction and benefits both mean=9.3 out of a possible 10,  $SD=2.4$ ) and the psycho-educational booklet (both mean=8.8,

1  
2  
3 SD=1.0). Intervention participants rated the difficulty of reading both booklets as not at all  
4  
5 difficult (mean =1.7, SD=3.2 for both). The control arm rated the Cancer Council booklet for  
6  
7 perceived satisfaction (mean = 7.2, SD=2.1), perceived benefit (mean = 6.7, SD=2.2), and  
8  
9 perceived difficulty (mean = 2.0, SD=2.7). Most intervention participants (7/11) provided  
10  
11 qualitative feedback on the benefits they experienced through taking part in the intervention.  
12  
13 These included: having an opportunity to share one's fears and discuss issues in depth,  
14  
15 feeling understood by the psychologist, having positive experiences acknowledged, and  
16  
17 improved communication with their doctor. Table 3 summarises all themes and provides  
18  
19 sample quotes from participants.  
20  
21  
22  
23  
24

25 *Ratings of the psycho-educational booklet, Melanoma: Questions and Answers*

26  
27 All participants in the intervention group found the information in the psycho-educational  
28  
29 booklet on different types of melanoma, risk of developing melanoma (presented as  
30  
31 pictographs), skin self-examination, and sun protection 'quite' or 'very helpful'. Nine of the  
32  
33 11 participants ) found the information on genetics and family history, vitamin D, how  
34  
35 melanoma can affect the way people feel, coping strategies, and living with the fear that  
36  
37 melanoma may come back 'quite' or 'very helpful'.  
38  
39

40  
41 Participants also rated the tools provided in the booklet highly. The tool on how to  
42  
43 perform a skin self-examination was perceived as most helpful (9/11), followed by the tool  
44  
45 about the UV index (8/11). The least helpful tool was the SunSmart telephone application  
46  
47 designed to provide sun protection and exposure information across Australia (3/11). The  
48  
49 majority of participants (9/11) agreed or strongly agreed that participation in the study had  
50  
51 helped them to learn more about the recommended frequency of skin examinations, and how  
52  
53 to find the information to assist in coping with melanoma. Most participants (8/11) reported  
54  
55  
56  
57  
58  
59  
60

1  
2  
3 that participation in the intervention helped them talk more openly with their doctor at their  
4  
5 high-risk clinic appointment.  
6  
7

#### 8 9 10 Ratings of the Cancer Council booklet, *Understanding Melanoma*

11 The Cancer Council booklet was perceived as a good source of medical information and  
12  
13 reassurance that supplemented information from their doctors (Table 2). One participant in  
14  
15 the intervention group (woman, MS353) stated that she “*had read the [Cancer Council] book*  
16  
17 *before.*” Nine participants in the control group commented on the benefits they gained from  
18  
19 reading the booklet.  
20  
21

#### 22 23 24 Difficulties

25  
26 When asked about difficulties or challenges associated with the intervention, four  
27  
28 intervention participants identified difficulties discussing their concerns with a psychologist;  
29  
30 one participant [man, MS282] reported “*I’ve usually tried to avoid thinking about melanoma*  
31  
32 *rather than being prepared to discuss the subject so initially at least, the study was a little*  
33  
34 *uncomfortable.*” Another participant [woman, MS155] found “*the telephone session a little*  
35  
36 *intense. Found the questions that were asked/discussed during the session raised*  
37  
38 *issues/concerns that I had not really thought of before the session.*” In the control group, one  
39  
40 participant [man, MS223] described the information provided in the Cancer Council booklet  
41  
42 as “*confronting*”.  
43  
44  
45  
46  
47  
48

#### 49 50 Quality of information and support provided throughout the trial

51 The mean score for the quality of information as rated by the intervention group was 4.6 out  
52  
53 of a possible 5 (SD=0.9) and 4.2 (SD=1.2) for the control group. The mean score for the  
54  
55 support given was 4.7 (SD=0.9) by the intervention arm and 4.2 (SD=1.4) by the controls.  
56  
57



1  
2  
3 Ten out of 11 participants in the intervention group reported that they would recommend the  
4  
5 program to other melanoma patients and nine out of 12 participants in the control group  
6  
7 would recommend the Cancer Council booklet.  
8  
9

10  
11 *Participants' preferences for three or five telephone-based sessions with a psychologist*

12  
13  
14 Of the 11 participants who completed the intervention, six preferred to receive three  
15  
16 psychology sessions and five preferred five sessions. Mean perceived satisfaction and  
17  
18 benefits were very high irrespective of session number; for participants who received three  
19  
20 sessions, mean satisfaction was 10/10 ( $SD=0$ ) and mean perceived benefits was 9.4/10  
21  
22 ( $SD=0.6$ ) and for participants who received five sessions, mean satisfaction was 8.7 ( $SD=3.3$ )  
23  
24 and mean perceived benefits was 8.7 ( $SD=3.3$ ). On average, participants engaged in three  
25  
26 hours of telephone-based psychological support (mean = 3.0,  $SD=1.4$ ), with a mean session  
27  
28 duration of 50 minutes (range: 9 to 95 minutes).  
29  
30  
31  
32  
33

34 *Cooperation with and retention in the intervention*

35  
36 All but one intervention participant completed the intervention, and 96% (23/24) of all study  
37  
38 participants completed one- and 6-month questionnaires. Of the five participants who  
39  
40 received all five telephone-based psychology sessions, four had sessions timed around their  
41  
42 high-risk clinic appointments as per protocol, and one participant missed her subsequent  
43  
44 high-risk clinic appointment but still took part in her last psychology session. For the six  
45  
46 participants who received three psychology sessions, five received them as planned and one  
47  
48 participant had this final last session delayed by a week.  
49  
50  
51  
52  
53  
54  
55  
56  
57  
58  
59  
60

### *Preliminary outcomes*

Table 4 summarises within group changes for primary and secondary outcomes and between-group effect sizes. Preliminary results suggest a reduction in mean fear of cancer recurrence severity scores for both intervention and control groups at 1-month follow-up, with a mean difference of -1.82 (SD=3.8) in the intervention group and -1.17 (SD=2.6) in the control group. The 6-month follow-up showed the reduction in fear of cancer recurrence severity was maintained in the intervention group (mean difference = -1.64, SD = 4.4) but not in the control group, which reverted to the baseline score (mean difference=0.08, SD=6.92).

Although the mean depression, anxiety, and stress scores were in the 'normal' range for both groups, at 1-month follow-up mean depression, anxiety and stress scores increased in the intervention arm and decreased in the control arm. At 6-months follow-up there was a decrease in mean depression scores in the intervention group and an increase in the control group. Mean anxiety and stress scores decreased in both groups at 6 months.

For the intervention group, melanoma knowledge scores increased at 1-month but were not maintained at 6-months. There was improvement in satisfaction with clinical care at both 1- and 6-month follow-up.

For health-related quality of life there was no change in overall mean quality of life scores, as measured by the AQoL-8D; however, an increase in the mean Functional Assessment of Cancer Therapy (FACT-M) total score, suggesting improved quality of life, was found for both intervention and control groups at 6-months follow-up. The utility-based quality of life score from the AQoL-8D is low in this group compared to the general Australian population<sup>20</sup> – although our sample is small and we will need to investigate this in a larger trial.

At baseline, of the 52 items in the melanoma survivor unmet needs instrument, the mean proportion of unmet needs was 16% (SD=0.21) for the intervention group and 14% (SD=0.15) for the usual care group. At 1-month follow the proportion of unmet needs

1  
2  
3 decreased for the intervention (mean=11%, SD=0.15) and remained unchanged for the  
4  
5 control arm. At 6 month there was decrease for the proportion of unmet needs in both groups  
6  
7 with 8% (SD=0.11) for the intervention and 9% (SD+0.11) for the control group.  
8  
9  
10  
11  
12  
13  
14  
15  
16  
17  
18  
19  
20  
21  
22  
23  
24  
25  
26  
27  
28  
29  
30  
31  
32  
33  
34  
35  
36  
37  
38  
39  
40  
41  
42  
43  
44  
45  
46  
47  
48  
49  
50  
51  
52  
53  
54  
55  
56  
57  
58  
59  
60

For peer review only

## Discussion

This pilot randomised controlled trial examined the acceptability, feasibility and preliminary outcomes of a psycho-educational intervention for people at high-risk of developing another primary melanoma. Participants in the intervention group reported very high levels of satisfaction with the intervention, perceived the intervention as highly beneficial, and did not associate it with many difficulties. Melanoma patients in this study highly valued the access to individual psychological support, particularly in terms of having a health professional with whom to explore their fears and concerns. This finding is consistent with the results from a recent qualitative study with melanoma patients that found the most expressed needs were to be given time to ask questions, and to express melanoma-related concerns and fears.<sup>21</sup>

Satisfaction with the newly developed psycho-educational booklet, *Melanoma: Questions and Answers* was also very high. Participants described receiving information about diagnosis, staging, and prognosis as highly valuable and as providing a sense of comfort and confidence. Another Australian study that analysed 29 in-depth interviews with patients undergoing long-term follow-up after surgical treatment of stage I/II melanoma found patients highly valued the opportunity to learn about their ongoing prognosis and the changing risk of recurrence over time.<sup>22</sup> Other patient-reported benefits of our intervention were positive experiences (such as a sense of comfort, confidence, and feeling 'worthwhile'), and improved doctor-patient communication. Nevertheless, participants expressed the need for ongoing support and were also aware of the future challenges in accessing support when the study was completed. As to be expected, a small proportion of participants did experience difficulties related to opening up and discussing personal issues with a psychologist. The timing of the intervention in relation to high-risk clinic appointments was found to be feasible, and there was very high study retention (96%).

1  
2  
3 Pilot studies are not designed to evaluate the efficacy of an intervention; the primary purpose  
4  
5 of a pilot is to optimise intervention delivery and to identify the barriers and facilitators to its  
6  
7 implementation.<sup>23</sup> Nevertheless, pilot studies can provide preliminary empirical evidence of  
8  
9 intervention efficacy. Our preliminary results were suggestive of the intervention group  
10  
11 having greater reductions in the severity of fear of cancer recurrence, improved knowledge,  
12  
13 and satisfaction with clinical care, fewer unmet needs, compared to the control group. The  
14  
15 highly positive feedback from participants and the direction of outcomes support wider  
16  
17 testing of the intervention.  
18  
19

20  
21 Based on our experience with this pilot study, minor modifications were made to the  
22  
23 protocol for the larger trial. First, we considered it to be more practical and feasible to limit  
24  
25 the number of psychology sessions to three. This decision was made to best meet  
26  
27 participants' needs as well as ensure the trial was feasible in terms of study management,  
28  
29 budget and timelines. Participants in our study who received three sessions still gave high  
30  
31 ratings, and evidence from other studies has showed that brief interventions can be beneficial  
32  
33 for cancer patients.<sup>24,25</sup>  
34  
35  
36  
37

## 38 **Conclusions**

39  
40 This pilot study suggests that tailored psycho-education and psychological support for people  
41  
42 at high-risk of developing another melanoma provided both before and after dermatological  
43  
44 appointments by a highly trained and well supported psychology team was perceived by  
45  
46 participants as needed and highly beneficial.  
47  
48

49  
50 The implementation of a telephone-based psycho-educational program scheduled around  
51  
52 high-risk clinic appointments was highly feasible and acceptable to patients. These findings  
53  
54 inform the possible implementation of this model of psychological support in melanoma  
55  
56 patients' clinical care. We are currently carrying out a larger randomised controlled trial to  
57  
58  
59  
60

1  
2  
3 evaluate the efficacy and cost-effectiveness of this intervention, comprising the full colour  
4  
5 psycho-educational booklet and three telephone-based sessions with a psychologist,  
6  
7 compared to usual care.<sup>12</sup> These findings will further inform the implementation of this model  
8  
9  
10 of psychological support in melanoma patients' clinical care.  
11  
12  
13  
14  
15  
16  
17  
18  
19  
20  
21  
22  
23  
24  
25  
26  
27  
28  
29  
30  
31  
32  
33  
34  
35  
36  
37  
38  
39  
40  
41  
42  
43  
44  
45  
46  
47  
48  
49  
50  
51  
52  
53  
54  
55  
56  
57  
58  
59  
60

For peer review only

**List of abbreviations**

AQOL-8D: Assessment of quality of life -8 dimensions

CSQ: Consultation Satisfaction Questionnaire

DASS Depression Anxiety and Stress Scales

FACT-M: Functional Assessment of Cancer Therapy

FCRI: Fear of Cancer Recurrence Inventory

HRC: High Risk Clinic

**Declarations*****Ethics approval and consent to participate***

Approval to conduct the study was granted by the Sydney Local Health District (RPAH zone)

Ethics Review Committee (X13-0065 & HREC/13/RPAH/86), the Department of Health and

Ageing Human Research Ethics Committee (21/2013), the University of Sydney Human

Research Ethics Committee (2013/595), and the Australian Institute of Health and Welfare

Ethics Committee (EO 2013/4/58).

***Consent for publication***

Not applicable.

***Availability of data and materials***

Available on request.

***Competing interests***

The authors declare that they have no competing interests.

### ***Funding***

This work was supported by Cancer Institute NSW Translational Program Grants (G Mann, S Menzies, IDs 05/TPG/1-01 and 10/TPG/1-02), and a Project Grant from *beyondblue: the national depression initiative* (N Kasparian, ID 630575). AE Cust was supported by fellowships from the NHMRC (1063593) and Cancer Institute NSW (10/ECF/2-06). M Dieng received a PhD scholarship through a Cancer Institute NSW fellowship to AE Cust and a Sydney Catalyst Top-Up Research Scholar Award. N Kasparian was supported by a Career Development Fellowship from the National Health and Medical Research Council of Australia (NHMRC ID 1049238). RL Morton was supported by a Sidney Sax Early Career Fellowship (NHMRC ID 1054216). P Butow was supported by a NHMRC Senior Principal Research Fellowship (ID 1022582).

### ***Authors' contributions***

**Conception and design:** Kasparian NA, Dieng M, Cust AE, Butow P, Mann GJ, Morton RL, Menzies S, Costa DSJ.

**Provision of study materials or patients:** Kasparian NA, Dieng M, Cust AE, Butow P, Mann GJ, Morton RL, Menzies S, Costa DSJ, Mireskandari S.

**Collection and assembly of data:** Dieng M, Cust AE.

**Data analysis and interpretation:** Dieng M, Costa DSJ, Cust AE, Kasparian NA, Morton RL.

**Manuscript writing:** All authors.

**Final approval of manuscript:** All authors.

### ***Acknowledgements***

We would like to thank all the men and women who participated in this study and our patient representative who reviewed the study protocol and booklet; Amelia Smit for assistance with recruitment and data collection; and Helen Schmid, Leo Raudonikis and staff at each of the melanoma high risk clinics for facilitating the conduct of this study. This study has been



1  
2  
3  
4  
5  
6  
7  
8  
9  
10  
11  
12  
13  
14  
15  
16  
17  
18  
19  
20  
21  
22  
23  
24  
25  
26  
27  
28  
29  
30  
31  
32  
33  
34  
35  
36  
37  
38  
39  
40  
41  
42  
43  
44  
45  
46  
47  
48  
49  
50  
51  
52  
53  
54  
55  
56  
57  
58  
59  
60

endorsed by the Australia and New Zealand Melanoma Trials Group (ANZMTG) and by the Scientific Advisory Committee of the Psycho-oncology Co-operative Research Group (PoCoG).

For peer review only

## References

1. Australian Institute of Health and Welfare: Cancer in Australia: an overview 2014. In: Cancer series Edited by AIHW, vol. 90. Canberra: AIHW; 2014
2. Beutel ME, Fischbeck S, Binder H, et al: Depression, anxiety and quality of life in long-term survivors of malignant melanoma: a register-based cohort study. PLoS One 10:e0116440, 2015
3. McLoone J, Watts K, Menzies S, et al: When the risks are high: psychological adjustment among melanoma survivors at high risk of developing new primary disease. Qual Health Res 22:1102-13, 2012
4. Loquai C, Scheurich V, Syring N, et al: Screening for distress in routine oncological care-a survey in 520 melanoma patients. PLoS One 8:e66800, 2013
5. Francken AB, Bastiaannet E, Hoekstra HJ: Follow-up in patients with localised primary cutaneous melanoma. Lancet Oncol 6:608-21, 2005
6. Kasparian NA: Psychological stress and melanoma: are we meeting our patients' psychological needs? Clin Dermatol 31:41-6, 2013
7. Australian Cancer Network and Melanoma Guidelines Revision Working: Clinical Practice Guidelines for the Management of Melanoma in Australia and New Zealand. Wellington, Cancer Council Australia and Australian Cancer Network, Sydney and New Zealand Guidelines Group 2008.
8. Pflugfelder A, Kochs C, Blum A, et al: Malignant Melanoma S3-Guideline "Diagnosis, Therapy and Follow-up of Melanoma". Journal Der Deutschen Dermatologischen Gesellschaft 11:1-116, 2013
9. McLoone J, Menzies S, Meiser B, et al: Psycho-educational interventions for melanoma survivors: a systematic review. Psychooncology 22:1444-56, 2013

- 1  
2  
3 10. Costa DS, Dieng M, Cust AE, et al: Psychometric properties of the Fear of  
4  
5 Cancer Recurrence Inventory: an item response theory approach. *Psychooncology*, 2015  
6
- 7 11. Moloney FJ, Guitera P, Coates E, et al: Detection of primary melanoma in  
8  
9 individuals at extreme high risk: a prospective 5-year follow-up study. *JAMA Dermatol*  
10  
11 150:819-27, 2014  
12
- 13 12. Dieng M, Kasparian NA, Morton RL, et al: The Melanoma care study:  
14  
15 protocol of a randomised controlled trial of a psycho-educational intervention for melanoma  
16  
17 survivors at high risk of developing new primary disease. *BMC Psychol* 3:23, 2015  
18  
19
- 20 13. Abbass A, Kisely S, Kroenke K: Short-term psychodynamic psychotherapy  
21  
22 for somatic disorders. Systematic review and meta-analysis of clinical trials. *Psychother*  
23  
24 *Psychosom* 78:265-74, 2009  
25  
26
- 27 14. Blagys MD, Hilsenroth MJ: Distinctive activities of cognitive-behavioral  
28  
29 therapy. A review of the comparative psychotherapy process literature. *Clin Psychol Rev*  
30  
31 22:671-706, 2002  
32  
33
- 34 15. Shedler J: The efficacy of psychodynamic psychotherapy. *Am Psychol* 65:98-  
35  
36 109, 2010  
37
- 38 16. De Jong PaIKB: *Interviewing for solutions*. CA: Wadsworth Group., 2002  
39
- 40 17. Simard S, Savard J: Fear of Cancer Recurrence Inventory: development and  
41  
42 initial validation of a multidimensional measure of fear of cancer recurrence. *Support Care*  
43  
44 *Cancer* 17:241-51, 2009  
45  
46
- 47 18. Williams MV, Parker RM, Baker DW, et al: Inadequate functional health  
48  
49 literacy among patients at two public hospitals. *JAMA* 274:1677-82, 1995  
50  
51
- 52 19. Chew LD, Griffin JM, Partin MR, et al: Validation of screening questions for  
53  
54 limited health literacy in a large VA outpatient population. *J Gen Intern Med* 23:561-6, 2008  
55  
56  
57  
58  
59  
60

- 1  
2  
3 20. Hawthorne G, Korn S, Richardson J: Population norms for the AQoL derived  
4 from the 2007 Australian National Survey of Mental Health and Wellbeing. Aust N Z J  
5 Public Health 37:7-16, 2013  
6  
7  
8  
9  
10 21. Stamataki Z, Brunton L, Lorigan P, et al: Assessing the impact of diagnosis  
11 and the related supportive care needs in patients with cutaneous melanoma. Support Care  
12 Cancer 23:779-89, 2015  
13  
14  
15  
16 22. Morton RL, Rychetnik L, McCaffery K, et al: Patients' perspectives of long-  
17 term follow-up for localised cutaneous melanoma. Eur J Surg Oncol 39:297-303, 2013  
18  
19  
20  
21 23. Kistin C, Silverstein M: Pilot Studies: A Critical but Potentially Misused  
22 Component of Interventional Research. JAMA 314:1561-2, 2015  
23  
24  
25 24. Shapiro DA, Barkham M, Stiles WB, et al: Time is of the essence: A selective  
26 review of the fall and rise of brief therapy research. Psychol Psychother 76:211-35, 2003  
27  
28  
29  
30 25. Trask PC, Paterson AG, Griffith KA, et al: Cognitive-behavioral intervention  
31 for distress in patients with melanoma: comparison with standard medical care and impact on  
32 quality of life. Cancer 98:854-64, 2003  
33  
34  
35  
36  
37  
38  
39  
40  
41  
42  
43  
44  
45  
46  
47  
48  
49  
50  
51  
52  
53  
54  
55  
56  
57  
58  
59  
60

Table 1: Demographic and clinical characteristics of the sample.

| Characteristics                     | Intervention<br>N = 12 | Control<br>N = 12 |
|-------------------------------------|------------------------|-------------------|
|                                     | N (%) or Mean (SD)     |                   |
| <b>Gender</b>                       |                        |                   |
| Male                                | 8 (67%)                | 6 (50%)           |
| Female                              | 4 (33%)                | 6 (50%)           |
| <b>Age at baseline</b>              |                        |                   |
| Mean, SD                            | 56.7 (14.0)            | 61.0 (10.5)       |
| <b>Area</b>                         |                        |                   |
| Metropolitan                        | 7 (58%)                | 7 (58%)           |
| Regional                            | 4 (33%)                | 5 (42%)           |
| Rural                               | 1 (8%)                 | 0 (0%)            |
| <b>Country of birth</b>             |                        |                   |
| Australia                           | 11 (92%)               | 11 (92%)          |
| Other                               | 1 (8%)                 | 1 (8%)            |
| <b>Marital status</b>               |                        |                   |
| Married                             | 11 (92%)               | 8 (72.7%)         |
| Other                               | 1 (8%)                 | 3 (27.3%)         |
| <b>Children</b>                     |                        |                   |
| Yes                                 | 11 (92%)               | 8 (67%)           |
| No                                  | 1 (8%)                 | 4 (33%)           |
| <b>Highest level of education</b>   |                        |                   |
| No tertiary education               | 9 (75%)                | 8 (67%)           |
| University                          | 3 (25%)                | 3 (25%)           |
| Other                               | 0                      | 1 (8%)            |
| <b>Number of previous melanomas</b> | 3.3 (2.9)              | 2.3 (1.9)         |
| <b>Most recent melanoma subtype</b> |                        |                   |
| Superficial spreading melanoma      | 9 (75%)                | 4 (40%)           |
| In situ                             | 2 (17%)                | 2 (20%)           |
| Nodular                             | 0                      | 2 (20%)           |
| Melanoma not classified             | 1 (8%)                 | 2 (20%)           |
| <b>Breslow thickness (mm)</b>       | 0.78 (0.3 to 2.9)      | 1.3 (0.3 to 3.5)  |

**Table 2: Acceptability ratings for different components of the Melanoma Care Study**

|                                             | Response options                                | Intervention (N=11)<br>Mean (SD) | Control (N=12)<br>Mean (SD) |
|---------------------------------------------|-------------------------------------------------|----------------------------------|-----------------------------|
| <b>Satisfaction with:</b>                   |                                                 |                                  |                             |
| -                                           | Booklet, <i>Melanoma: Questions and Answers</i> | 8.8 (1.0)                        |                             |
| -                                           | Booklet, <i>Understanding Melanoma</i>          | 9.0 (1.1)                        | 7.2 (2.1) *                 |
| -                                           | Telephone-based psychology sessions             | 9.3 (2.4)                        |                             |
| -                                           | Overall program                                 | 8.7 (2.2)                        |                             |
| <b>Benefit of:</b>                          |                                                 |                                  |                             |
| -                                           | Booklet, <i>Melanoma: Questions and Answers</i> | 8.9 (1.2)                        |                             |
| -                                           | Booklet, <i>Understanding Melanoma</i>          | 8.8 (1.2)                        | 6.7 (2.2) *                 |
| -                                           | Telephone-based psychology sessions             | 9.3 (2.4)                        |                             |
| -                                           | Overall program                                 | 8.6 (2.1)                        |                             |
| -                                           |                                                 |                                  |                             |
| <b>Difficulty of:</b>                       |                                                 |                                  |                             |
| -                                           | Booklet, <i>Melanoma: Questions and Answers</i> | 1.7 (3.2)                        |                             |
| -                                           | Booklet, <i>Understanding Melanoma</i>          | 1.7 (3.2)                        | 2.0 (2.7) *                 |
| -                                           | Telephone-based psychology sessions             | 1.1 (2.4)                        |                             |
| -                                           | Overall program                                 | 1.1 (2.1)                        |                             |
| <b>Quality of:</b>                          |                                                 |                                  |                             |
| -                                           | Information                                     | 4.6 (0.9)                        | 4.17 (1.2)                  |
| -                                           | Support                                         | 4.7 (0.9)                        | 3.83 (1.4)                  |
| <b>Recommend to other melanoma patients</b> |                                                 |                                  |                             |
| -                                           | Yes                                             | 10 (91%)                         | 9 (75%)                     |
| -                                           | No                                              | 0                                | 0                           |
| -                                           | Unsure                                          | 1 (9%)                           | 3 (25%)                     |

\* For the control group, these questions only applied to the Cancer Council booklet.

**Table 3: Summary of participants' views on the perceived benefits of the Melanoma Care Study.**

| <i>Major themes</i>                                     | <i>Participant's ID<sup>#</sup></i> | <i>Participant quotations</i>                                                                                                                                                                                                                                                                                                             |
|---------------------------------------------------------|-------------------------------------|-------------------------------------------------------------------------------------------------------------------------------------------------------------------------------------------------------------------------------------------------------------------------------------------------------------------------------------------|
| An opportunity to share one's fears and feel understood | WP1                                 | <i>Cancer can be lonely and frightening and this allowed me to express all of those fears before and after appointments and about the impact on my life. This had never happened before. Other patients may not have anyone to talk to either. This was the best opportunity and I was in a dark place - you feel so much more alive.</i> |
|                                                         | MP1                                 | <i>I feel sharing private fears helped me deal with these issues.</i>                                                                                                                                                                                                                                                                     |
|                                                         | WP2                                 | <i>It helps to talk to someone who understands when you get your first melanoma.</i>                                                                                                                                                                                                                                                      |
| An opportunity to explore one's experiences in depth    | WP3                                 | <i>Engaging in a conversation with the psychologist made me realise that I still needed to address particular issues which I thought I had dealt with but obviously had not.</i>                                                                                                                                                          |
|                                                         | MP1                                 | <i>I felt that the sessions with my psychologist were the first real extended discussions I've had in relation to my melanoma risk in over 20 years of melanoma care. I was very satisfied at the end of the sessions because I felt I'd been able to share a burden and get some sensible advice.</i>                                    |
| Positive experiences                                    | MP2                                 | <i>Education gives understanding and comfort.</i>                                                                                                                                                                                                                                                                                         |
|                                                         | WP1                                 | <i>I feel happier for having someone to talk to about it. My psychologist made me think about taking control of my life and I feel I have been given the skills to understand and manage my fear and to feel worthwhile.</i>                                                                                                              |
|                                                         | MP3                                 | <i>Reinforced my confidence</i>                                                                                                                                                                                                                                                                                                           |
|                                                         | MP4                                 | <i>The psychologist assisted greatly with dealing with emotional feelings.</i>                                                                                                                                                                                                                                                            |
| Improved doctor-patient communication                   | MP1                                 | <i>I was given suggested strategies for dealing with negative thoughts about my melanoma risk. I was encouraged to discuss longstanding and new concerns with the high-risk clinic doctor. I felt that the psychologist was genuinely interested in helping me address concerns.</i>                                                      |
| Good source of medical information                      | WP4                                 | <i>Understand what happens after diagnosis, what to expect and support options available.</i>                                                                                                                                                                                                                                             |
|                                                         | WP5                                 | <i>A clearer understanding of the different stages of melanoma.</i>                                                                                                                                                                                                                                                                       |
| Supplement information from the doctors                 | WP4                                 | <i>I would recommend the booklet because it answers a lot of questions that you would sometimes forget to ask medical staff and you can also refer to it at any time to clarify any areas of confusion.</i>                                                                                                                               |
|                                                         | MP6                                 | <i>If various things are not explained by your GP, the booklet fills that void.</i>                                                                                                                                                                                                                                                       |
| Reassurance                                             | WP6                                 | <i>Statistics on recurrence that helped me feel calmer.</i>                                                                                                                                                                                                                                                                               |
| Requests for continued psychological support            | MP5                                 | <i>I wish the support was ongoing and not just a study and I hope that the study will result in this service eventually being a part of patients' treatment.</i>                                                                                                                                                                          |
|                                                         | MP1                                 | <i>Provide an annual 'catch-up' counselling call.</i>                                                                                                                                                                                                                                                                                     |
| Challenge for future support                            | WP1                                 | <i>The study and help came at the right time and the challenge for me will be to seek the help I may need in the future</i>                                                                                                                                                                                                               |
|                                                         | WP3                                 | <i>I suggest at the beginning of the sessions that patients might find they'd like help and support beyond the study and help them to find a suitable psychologist... I'm not sure how to find someone who might be better for cancer patients.</i>                                                                                       |
|                                                         | WP1                                 | <i>Feeling withdrawn and empty for a few weeks after the counselling stopped for a few months. Knowing it's only a study, even though I've been strongly encouraged to seek support after the study.</i>                                                                                                                                  |

1  
2  
3  
4  
5  
6  
7  
8  
9  
10  
11  
12  
13  
14  
15  
16  
17  
18  
19  
20  
21  
22  
23  
24  
25  
26  
27  
28  
29  
30  
31  
32  
33  
34  
35  
36  
37  
38  
39  
40  
41  
42  
43  
44  
45  
46  
47  
48  
49

# WP: Woman participant; MP: male participant.

For peer review only



Table 4: Preliminary outcomes, presented separately for the intervention and control groups.

| Outcomes                                                                | Assessment         | Mean (SD)          |                 | Between-Group mean difference <sup>1</sup> (95% CI) | Effect size <sup>5</sup> |
|-------------------------------------------------------------------------|--------------------|--------------------|-----------------|-----------------------------------------------------|--------------------------|
|                                                                         |                    | Intervention group | Control group   |                                                     |                          |
| FCR <sup>6</sup> severity <sup>2</sup><br>(Score range 0-36)            | Baseline           | 17.92 ( 6.29)      | 14.00 ( 5.53)   | -3.92 ( -8.93, 1.10)                                | - 0.66                   |
|                                                                         | Change at 1 month  | -1.82 ( 3.79)      | -1.17 ( 2.59)   | 0.65 ( -2.14, 3.44)                                 | - 0.51                   |
|                                                                         | Change at 6 months | -1.64 ( 4.37)      | 0.08 ( 6.92)    | 1.72 ( -3.35, 6.79)                                 | - 0.33                   |
| DASS <sup>7</sup> Depression<br>(Score range 0-42)                      | Baseline           | 3.33 ( 5.28)       | 2.50 ( 3.09)    | -0.83 ( -4.50, 2.83)                                | - 0.19                   |
|                                                                         | Change at 1 month  | 2.00 ( 7.54)       | -0.17 ( 2.76)   | -2.17 ( -7.00, 2.67)                                | - 0.51                   |
|                                                                         | Change at 6 months | -2.00 ( 4.73)      | 0.67 ( 2.31)    | 2.67 ( -0.52, 5.85)                                 | + 0.46                   |
| DASS <sup>7</sup> Anxiety <sup>2</sup><br>(Score range 0-42)            | Baseline           | 2.67 ( 5.42)       | 1.17 ( 1.99)    | -1.50 ( -4.95, 1.95)                                | - 0.37                   |
|                                                                         | Change at 1 month  | 0.36 ( 5.71)       | -0.50 ( 2.11)   | -0.86 ( -4.53, 2.81)                                | - 0.61                   |
|                                                                         | Change at 6 months | 0.36 ( 5.71)       | -0.67 ( 1.78)   | 0.06 ( -2.25, 2.37)                                 | - 0.48                   |
| DASS <sup>7</sup> Stress <sup>2</sup><br>(Score range 0-42)             | Baseline           | 6.00 ( 9.91)       | 5.17 ( 4.86)    | -0.83 ( -7.44, 5.77)                                | - 0.11                   |
|                                                                         | Change at 1 month  | 0.36 ( 8.52)       | -1.17 ( 5.01)   | -1.53 ( -7.53, 4.47)                                | - 0.35                   |
|                                                                         | Change at 6 months | -2.36 ( 8.29)      | -1.33 ( 6.95)   | 1.03 ( -5.58, 7.64)                                 | - 0.07                   |
| Melanoma knowledge <sup>3</sup><br>(Score range 0-35)                   | Baseline           | 22.83 ( 2.04)      | 23.17 ( 2.62)   | 0.33 ( -1.65, 2.32)                                 | +0.14                    |
|                                                                         | Change at 1 month  | 1.64 ( 2.34)       | 0.33 ( 3.50)    | -1.30 ( -3.91, 1.30)                                | - 0.30                   |
|                                                                         | Change at 6 months | 1.40 ( 2.63)       | -0.33 ( 3.65)   | -1.73 ( -4.62, 1.15)                                | - 0.32                   |
| Satisfaction with melanoma care <sup>3</sup><br>(Score range 0-90)      | Baseline           | 59.92 ( 11.85)     | 59.58 ( 12.37)  | -0.33 ( -10.59, 9.92)                               | - 0.03                   |
|                                                                         | Change at 1 month  | 14.27 ( 11.94)     | 8.42 ( 14.22)   | -5.86 ( -17.30, 5.59)                               | - 0.84                   |
|                                                                         | Change at 6 months | -11.60 ( 11.49)    | -1.73 ( 17.98)  | 9.87 ( -4.08, 23.82)                                | + 0.50                   |
| FACT- M <sup>9</sup> total <sup>4</sup><br>score<br>(Score range 0-172) | Baseline           | 143.83 ( 18.35)    | 146.50 ( 12.64) | 2.67 ( -10.67, 16.01)                               | + 0.17                   |
|                                                                         | Change at 6 months | 1.90 ( 7.20)       | 3.83 ( 16.70)   | 1.93 ( -9.94, 13.81)                                | + 0.13                   |

<sup>1</sup> Between-Group mean difference = mean control-mean intervention

<sup>2</sup> For FCR severity and DASS a lower score means a better outcome

<sup>3</sup> For Knowledge and Satisfaction with clinical care scores a higher score represents a better outcome

1  
2  
3  
4  
5  
6  
7  
8  
9  
10  
11  
12  
13  
14  
15  
16  
17  
18  
19  
20  
21  
22  
23  
24  
25  
26  
27  
28  
29  
30  
31  
32  
33  
34  
35  
36  
37  
38  
39  
40  
41  
42  
43  
44  
45  
46  
47  
48  
49

5 Cohen d effect size 6 FCR Fear of cancer recurrence; 7 Depression anxiety stress scale; FACT-M Functional Assessment cancer therapy-Melanoma FACT-M were not collected at 1-month as we wanted to minimise participant burden at this intermediate time point.

For peer review only

## CONSORT checklist of information to include when reporting a pilot trial\*

| Section/topic and item No  | Standard checklist item                                                                                                               | Extension for pilot trials                                                                                                                                   | Page No where item is reported |
|----------------------------|---------------------------------------------------------------------------------------------------------------------------------------|--------------------------------------------------------------------------------------------------------------------------------------------------------------|--------------------------------|
| <b>Title and abstract</b>  |                                                                                                                                       |                                                                                                                                                              |                                |
| 1a                         | Identification as a randomised trial in the title                                                                                     | Identification as a pilot or feasibility randomised trial in the title                                                                                       | Page 1                         |
| 1b                         | Structured summary of trial design, methods, results, and conclusions (for specific guidance see CONSORT for abstracts)               | Structured summary of pilot trial design, methods, results, and conclusions (for specific guidance see CONSORT abstract extension for pilot trials)          | Page 3                         |
| <b>Introduction</b>        |                                                                                                                                       |                                                                                                                                                              |                                |
| Background and objectives: |                                                                                                                                       |                                                                                                                                                              |                                |
| 2a                         | Scientific background and explanation of rationale                                                                                    | Scientific background and explanation of rationale for future definitive trial, and reasons for randomised pilot trial                                       | Pages 5-6                      |
| 2b                         | Specific objectives or hypotheses                                                                                                     | Specific objectives or research questions for pilot trial                                                                                                    | Page 6                         |
| <b>Methods</b>             |                                                                                                                                       |                                                                                                                                                              |                                |
| Trial design:              |                                                                                                                                       |                                                                                                                                                              |                                |
| 3a                         | Description of trial design (such as parallel, factorial) including allocation ratio                                                  | Description of pilot trial design (such as parallel, factorial) including allocation ratio                                                                   | page 6                         |
| 3b                         | Important changes to methods after trial commencement (such as eligibility criteria), with reasons                                    | Important changes to methods after pilot trial commencement (such as eligibility criteria), with reasons                                                     | page 6                         |
| Participants:              |                                                                                                                                       |                                                                                                                                                              |                                |
| 4a                         | Eligibility criteria for participants                                                                                                 |                                                                                                                                                              |                                |
| 4b                         | Settings and locations where the data were collected                                                                                  |                                                                                                                                                              |                                |
| 4c                         |                                                                                                                                       | How participants were identified and consented                                                                                                               | Page 6                         |
| Interventions:             |                                                                                                                                       |                                                                                                                                                              |                                |
| 5                          | The interventions for each group with sufficient details to allow replication, including how and when they were actually administered |                                                                                                                                                              | pages 7-8                      |
| Outcomes:                  |                                                                                                                                       |                                                                                                                                                              |                                |
| 6a                         | Completely defined prespecified primary and secondary outcome measures, including how and when they were assessed                     | Completely defined prespecified assessments or measurements to address each pilot trial objective specified in 2b, including how and when they were assessed | pages 9-11                     |
| 6b                         | Any changes to trial outcomes after the trial commenced, with reasons                                                                 | Any changes to pilot trial assessments or measurements after the pilot trial commenced, with reasons                                                         |                                |
| 6c                         |                                                                                                                                       | If applicable, prespecified criteria used to judge whether, or how, to proceed with future definitive trial                                                  |                                |

Sample size:

- 7a How sample size was determined Rationale for numbers in the pilot trial
- 7b When applicable, explanation of any interim analyses and stopping guidelines

page 6.  
(conveniently kept)

Randomisation:

Sequence generation:

- 8a Method used to generate the random allocation sequence
- 8b Type of randomisation; details of any restriction (such as blocking and block size) Type of randomisation(s); details of any restriction (such as blocking and block size)

page 9

Allocation concealment mechanism:

- 9 Mechanism used to implement the random allocation sequence (such as sequentially numbered containers), describing any steps taken to conceal the sequence until interventions were assigned

page 9.

Implementation:

- 10 Who generated the random allocation sequence, enrolled participants, and assigned participants to interventions

page 9.

Blinding:

- 11a If done, who was blinded after assignment to interventions (eg, participants, care providers, those assessing outcomes) and how
- 11b If relevant, description of the similarity of interventions

No blinding

Analytical methods:

- 12a Statistical methods used to compare groups for primary and secondary outcomes Methods used to address each pilot trial objective whether qualitative or quantitative
- 12b Methods for additional analyses, such as subgroup analyses and adjusted analyses Not applicable

page 11

Results

Participant flow (a diagram is strongly recommended):

- 13a For each group, the numbers of participants who were randomly assigned, received intended treatment, and were analysed for the primary outcome For each group, the numbers of participants who were approached and/or assessed for eligibility, randomly assigned, received intended treatment, and were assessed for each objective
- 13b For each group, losses and exclusions after randomisation, together with reasons

Page 12

Recruitment:

|                                 |                                                                                                                                                   |                                                                                                                                                                                           |
|---------------------------------|---------------------------------------------------------------------------------------------------------------------------------------------------|-------------------------------------------------------------------------------------------------------------------------------------------------------------------------------------------|
| 14a                             | Dates defining the periods of recruitment and follow-up                                                                                           |                                                                                                                                                                                           |
| 14b                             | Why the trial ended or was stopped                                                                                                                | Why the pilot trial ended or was stopped                                                                                                                                                  |
| <b>Baseline data:</b>           |                                                                                                                                                   |                                                                                                                                                                                           |
| 15                              | A table showing baseline demographic and clinical characteristics for each group                                                                  | Table 1                                                                                                                                                                                   |
| <b>Numbers analysed:</b>        |                                                                                                                                                   |                                                                                                                                                                                           |
| 16                              | For each group, number of participants (denominator) included in each analysis and whether the analysis was by original assigned groups           | For each objective, number of participants (denominator) included in each analysis. If relevant, these numbers should be by randomised group<br>Table 1                                   |
| <b>Outcomes and estimation:</b> |                                                                                                                                                   |                                                                                                                                                                                           |
| 17a                             | For each primary and secondary outcome, results for each group, and the estimated effect size and its precision (such as 95% confidence interval) | For each objective, results including expressions of uncertainty (such as 95% confidence interval) for any estimates. If relevant, these results should be by randomised group<br>Table 4 |
| 17b                             | For binary outcomes, presentation of both absolute and relative effect sizes is recommended                                                       | Not applicable                                                                                                                                                                            |
| <b>Ancillary analyses:</b>      |                                                                                                                                                   |                                                                                                                                                                                           |
| 18                              | Results of any other analyses performed, including subgroup analyses and adjusted analyses, distinguishing prespecified from exploratory          | Results of any other analyses performed that could be used to inform the future definitive trial<br>Table 2<br>Table 3                                                                    |
| <b>Harms:</b>                   |                                                                                                                                                   |                                                                                                                                                                                           |
| 19                              | All important harms or unintended effects in each group (for specific guidance see CONSORT for harms)                                             |                                                                                                                                                                                           |
| 19a                             |                                                                                                                                                   | If relevant, other important unintended consequences                                                                                                                                      |
| <b>Discussion</b>               |                                                                                                                                                   |                                                                                                                                                                                           |
| <b>Limitations:</b>             |                                                                                                                                                   |                                                                                                                                                                                           |
| 20                              | Trial limitations, addressing sources of potential bias, imprecision, and, if relevant, multiplicity of analyses                                  | Pilot trial limitations, addressing sources of potential bias and remaining uncertainty about feasibility<br>Page 18                                                                      |
| <b>Generalisability:</b>        |                                                                                                                                                   |                                                                                                                                                                                           |
| 21                              | Generalisability (external validity, applicability) of the trial findings                                                                         | Generalisability (applicability) of pilot trial methods and findings to future definitive trial and other studies<br>Page 18                                                              |
| <b>Interpretation:</b>          |                                                                                                                                                   |                                                                                                                                                                                           |
| 22                              | Interpretation consistent with results, balancing benefits and harms, and considering other relevant evidence                                     | Interpretation consistent with pilot trial objectives and findings, balancing potential benefits and harms, and considering other relevant evidence<br>Page 18                            |
| 22a                             |                                                                                                                                                   | Implications for progression from pilot to future definitive trial, including any proposed amendments                                                                                     |
| <b>Other information</b>        |                                                                                                                                                   |                                                                                                                                                                                           |

Registration:

23

Registration number and name of trial registry

Registration number for pilot trial and name of trial registry

Page 4

Protocol:

24

Where the full trial protocol can be accessed, if available

Where the pilot trial protocol can be accessed, if available

Page 22

Funding:

25

Sources of funding and other support (such as supply of drugs), role of funders

Page 22

26

Ethical approval or approval by research review committee, confirmed with reference number

Page 2

---

\*Here a pilot trial means any randomised study conducted in preparation for a future definitive RCT, where the main objective of the pilot trial is to assess feasibility.

4  
5  
6  
7  
8  
9  
10  
11  
12  
13  
14  
15  
16  
17  
18  
19  
20  
21  
22  
23  
24  
25  
26  
27  
28  
29  
30  
31  
32  
33  
34  
35  
36  
37  
38  
39  
40  
41  
42  
43  
44  
45  
46  
47  
48  
49  
50  
51  
52  
53  
54  
55  
56  
57  
58  
59  
60

# BMJ Open

## A psycho-educational intervention for people at high risk of developing another melanoma: A pilot randomised controlled trial

|                                 |                                                                                                                                                                                                                                                                                                                                                                                                                                                                                                                                                                                                                                                                                                                                                                                            |
|---------------------------------|--------------------------------------------------------------------------------------------------------------------------------------------------------------------------------------------------------------------------------------------------------------------------------------------------------------------------------------------------------------------------------------------------------------------------------------------------------------------------------------------------------------------------------------------------------------------------------------------------------------------------------------------------------------------------------------------------------------------------------------------------------------------------------------------|
| Journal:                        | <i>BMJ Open</i>                                                                                                                                                                                                                                                                                                                                                                                                                                                                                                                                                                                                                                                                                                                                                                            |
| Manuscript ID                   | bmjopen-2016-015195.R1                                                                                                                                                                                                                                                                                                                                                                                                                                                                                                                                                                                                                                                                                                                                                                     |
| Article Type:                   | Research                                                                                                                                                                                                                                                                                                                                                                                                                                                                                                                                                                                                                                                                                                                                                                                   |
| Date Submitted by the Author:   | 21-Jun-2017                                                                                                                                                                                                                                                                                                                                                                                                                                                                                                                                                                                                                                                                                                                                                                                |
| Complete List of Authors:       | Dieng, Mbathio; The University of Sydney, Sydney Medical School<br>Kasparian, N; University of New South Wales, 2) Discipline of Paediatrics, School of Women's and Children's Health<br>Mireskandari, Shab; The university of Sydney, 3) Centre for Medical Psychology & Evidence-based Decision-making<br>Butow, Phyllis; university of sydney, School of Psychology<br>Costa, Daniel; The University of Sydney, Pain Management Research Institute<br>Morton, Rachael; The University of Sydney, NHMRC Clinical Trials Centre<br>Mann, Graham; University of Sydney, Western Clinical School, Westmead Millenium Institute<br>Menzies, Scott; The University of Sydney, Discipline of Dermatology, Sydney Medical School<br>Cust, Anne; The University of Sydney, Sydney Medical School |
| <b>Primary Subject Heading</b>: | Oncology                                                                                                                                                                                                                                                                                                                                                                                                                                                                                                                                                                                                                                                                                                                                                                                   |
| Secondary Subject Heading:      | Public health, Qualitative research, Mental health, Oncology                                                                                                                                                                                                                                                                                                                                                                                                                                                                                                                                                                                                                                                                                                                               |
| Keywords:                       | melanoma, psycho-education, pilot study, cancer, supportive care, Feasibility                                                                                                                                                                                                                                                                                                                                                                                                                                                                                                                                                                                                                                                                                                              |
|                                 |                                                                                                                                                                                                                                                                                                                                                                                                                                                                                                                                                                                                                                                                                                                                                                                            |

SCHOLARONE™  
Manuscripts

1  
2  
3 **A psycho-educational intervention for people at high risk of developing another**  
4 **melanoma: A pilot randomised controlled trial**  
5

6 Authors: Dieng M<sup>1,6</sup>, Kasparian NA<sup>2\*</sup>, Mireskandari S<sup>3</sup>, Butow P<sup>4</sup>, Costa DSJ<sup>5</sup>, Morton RL<sup>6</sup>,  
7 Mann GJ<sup>7,8</sup>, Menzies S<sup>9,10</sup>, Cust AE<sup>1,7\*</sup>  
8

- 9 1) *Cancer Epidemiology and Prevention Research, Sydney School of Public Health, The*  
10 *University of Sydney, NSW, Australia.*  
11  
12 2) *Discipline of Paediatrics, School of Women's and Children's Health, UNSW*  
13 *Medicine, The University of New South Wales, Sydney, NSW, Australia.*  
14  
15 3) *Centre for Medical Psychology & Evidence-based Decision-making, The University*  
16 *of Sydney, NSW, Australia*  
17  
18 4) *Psycho-oncology Co-operative Research Group, School of Psychology, University of*  
19 *Sydney, NSW, Australia.*  
20  
21 5) *Pain Management Research Institute, University of Sydney at Royal North Shore*  
22 *Hospital, St Leonards, NSW, Australia*  
23  
24 6) *NHMRC Clinical Trials Centre, University of Sydney, Camperdown, NSW, Australia*  
25  
26 7) *Centre for Cancer Research, Westmead Institute for Medical Research, University of*  
27 *Sydney, Westmead, Australia*  
28  
29 8) *Melanoma Institute Australia, University of Sydney, North Sydney, Australia*  
30  
31 9) *Discipline of Dermatology, Sydney Medical School, The University of Sydney*  
32  
33 10) *The Sydney Melanoma Diagnostic Centre, Royal Prince Alfred Hospital,*  
34 *Camperdown, NSW, Australia*  
35

36  
37  
38  
39 *\*Cust AE and Kasparian NA contributed equally to this work and share senior*  
40 *authorship on this paper.*  
41  
42  
43

44 **Email addresses:**

45 Mbathio Dieng: [mbathio.dieng@sydney.edu.au](mailto:mbathio.dieng@sydney.edu.au)  
46 Nadine A Kasparian: [n.kasparian@unsw.edu.au](mailto:n.kasparian@unsw.edu.au)  
47 Shab Mireskandari: [Shab.mireskandari@sydney.edu.au](mailto:Shab.mireskandari@sydney.edu.au)  
48 Phyllis Butow: [phyllis.butow@sydney.edu.au](mailto:phyllis.butow@sydney.edu.au)  
49 Daniel SJ Costa: [Daniel.costa@sydney.edu.au](mailto:Daniel.costa@sydney.edu.au)  
50 Rachael L Morton: [Rachael.morton@ctc.usyd.edu.au](mailto:Rachael.morton@ctc.usyd.edu.au)  
51 Graham J Mann: [graham.mann@sydney.edu.au](mailto:graham.mann@sydney.edu.au)  
52 Scott Menzies: [scott.menzies@sswahs.nsw.gov.au](mailto:scott.menzies@sswahs.nsw.gov.au)  
53 Anne E Cust: [anne.cust@sydney.edu.au](mailto:anne.cust@sydney.edu.au)  
54  
55  
56  
57  
58  
59  
60



**Corresponding author at:**

Mbathio Dieng

Cancer Epidemiology and Prevention Research

The Lifehouse, Level 6 North, 119-143 Missenden Road

Camperdown NSW 2050

Australia

Tel: +61 28 627 1538

[mbathio.dieng@sydney.edu.au](mailto:mbathio.dieng@sydney.edu.au)

For peer review only

## ABSTRACT

**Introduction:** Information and psychological needs have been reported as ones of the greatest areas of unmet needs for melanoma patients. To respond to these needs, we developed the *Melanoma Care Intervention* a developed psycho-educational intervention for people at high risk of developing another melanoma comprising of a newly developed melanoma educational booklet and individually tailored telephone support sessions provided by trained psychologists. The purpose of this study was to investigate the acceptability and feasibility of the *Melanoma Care Intervention*.

**Methods:** Twenty-four adults (14 men, 10 women, mean age: 58 years, SD:12.2) at high risk of developing a subsequent primary melanoma were recruited and randomly assigned 1:1 to the intervention (a psycho-educational booklet, a Cancer Council booklet on melanoma, and up to five telephone-based sessions with a psychologist) or usual care (Cancer Council booklet only). Acceptability, feasibility, fear of cancer recurrence and secondary psychosocial outcomes were assessed at baseline, one and six months.

**Results:** Satisfaction and perceived benefits were rated highly for all intervention components, particularly the telephone-based psychology sessions (mean satisfaction and benefits: both 9.27 out of 10, SD=2.41). The quality of information and support provided throughout the trial was rated as 'high' by the intervention group, with a mean score of 4.6 out of a possible 5 (SD=0.9) and 4.2 (SD=1.2) for the control group.

**Conclusions:** The intervention was feasible and acceptable for improving psychological adjustment. Timely access to effective, evidence-based, psychological care is a recognised need for people with melanoma. The intervention is designed to directly address this need in a way that is feasible in a clinical setting, acceptable to patients and health professionals.

1  
2  
3 **Keywords:** Melanoma; psycho-education; pilot study; supportive care; feasibility; cancer;  
4  
5 psychological stress.  
6

7 **Trial registration number:** The trial was registered with the Australian and New Zealand  
8  
9 Clinical Trials Registry on 19/03/2013 (Registration Number: ACTRN12613000304730).  
10  
11

### 12 13 14 **Strengths and limitations of this study**

- 15 • The results are generalisable to people who have had early stage melanoma, and  
16  
17 further research is needed to know if people with advanced melanoma have a similar  
18  
19 response to the intervention.  
20  
21
- 22 • Although recommended in the Australian clinical practice guidelines, psychological  
23  
24 support (provided by a psychologist) is not currently part of routine care for people  
25  
26 diagnosed with melanoma.  
27  
28
- 29 • Further research to demonstrate a sustained feasibility when the intervention is  
30  
31 delivered by trained nurses or health educators could perhaps facilitate  
32  
33 implementation.  
34  
35  
36  
37  
38  
39  
40  
41  
42  
43  
44  
45  
46  
47

### 48 **Background**

49  
50 Early detection and appropriate clinical management of melanoma ensures that most people  
51  
52 with the disease have a good prognosis, with about 90% of patients still alive five years after  
53  
54 diagnosis.<sup>1</sup> Despite this good prognosis, melanoma survivors have an ongoing threat of  
55  
56 recurrence and are recommended to carry out regular skin self-examinations, have regular  
57  
58  
59  
60

1  
2  
3 clinical skin examinations, and undertake behavioural changes to minimise excessive sun  
4 exposure;<sup>2</sup> all of which can add to the psychological burden of melanoma.<sup>3</sup> In addition,  
5  
6  
7 people with melanoma often experience intense fear that the disease could spread and  
8  
9  
10 become untreatable. Studies have reported that 30-50% of melanoma survivors experience  
11  
12 heightened emotional distress,<sup>2</sup> and that many report unmet needs for information and  
13  
14 psychological support.<sup>4-6</sup> Australian clinical practice guidelines for the management of  
15  
16 melanoma highly recommended that psycho-educational support be made widely available  
17  
18 to people with melanoma.<sup>7</sup> German guidelines extend this by recommending implementation  
19  
20 of regular psycho-oncological screening to identify and offer psychological care to people  
21  
22 with melanoma experiencing difficulties adjusting to their disease.<sup>8</sup> Several psycho-  
23  
24 educational interventions for melanoma patients have been reported in the literature, with  
25  
26 beneficial outcomes.<sup>9</sup> In a systematic review of 16 interventions, McLoone et al. concluded  
27  
28 that participation in psychological interventions resulted in lower anxiety, health-related  
29  
30 distress and melanoma recurrence rates, and positive changes in coping with illness.<sup>9</sup>  
31  
32  
33

34 People at high-risk of a subsequent melanoma are particularly vulnerable to distress.  
35  
36 Seventy-five percent of high-risk melanoma survivors report persistent fear and uncertainty  
37  
38 about the possibility of developing new disease, cancer recurrence or metastases.<sup>3,10</sup> Despite  
39  
40 this, psychological support is not currently offered in Australian high-risk clinics that provide  
41  
42 a specialised clinical service for people at very high-risk of primary melanoma,<sup>11</sup> nor have  
43  
44 specific interventions been designed for this high-risk sub-group. To address this gap, our  
45  
46 team developed a multifaceted psychological care program for people at high-risk of  
47  
48 developing another primary melanoma (the *Melanoma Care Study*).<sup>12</sup> The intervention is  
49  
50 comprised of up to five individual, telephone-based sessions with a psychologist, combined  
51  
52 with an evidence-based psycho-educational booklet designed to respond to the unmet  
53  
54 supportive care needs of people who have had melanoma.  
55  
56  
57  
58  
59  
60

1  
2  
3 This pilot study had two aims: (1) evaluate the acceptability of, and participant  
4 satisfaction with, the *Melanoma Care Study*; (2) determine the feasibility of delivering  
5 telephone-based psychology sessions scheduled in relation to dermatological appointments at  
6 melanoma high-risk clinics.  
7  
8  
9  
10

## 11 12 13 **Methods**

### 14 *Study design and participants*

15  
16 A randomised controlled trial design was used to pilot the *Melanoma Care Study*. Participants  
17 were recruited from three melanoma high-risk clinics in New South Wales, Australia; two  
18 situated in inner-city Sydney and one in a regional coastal city. These high-risk clinics  
19 provide a specialised clinical service for people at very high-risk of primary melanoma,<sup>11</sup>  
20 including people with a previous melanoma and either a strong family history of melanoma,  
21 many moles (i.e. dysplastic naevus syndrome), or a history of multiple primary melanomas.  
22 People aged 18 years or older with a history of stage 0, I or II melanoma were identified from  
23 the clinic databases and invited to participate. People were ineligible if they were identified  
24 as high-risk but had never had melanoma (e.g. people who carry a high penetrance genetic  
25 mutation); or had a known history of severe major depression, psychotic illness or other  
26 serious psychiatric condition or cognitive deficit, or were unable to participate in English.  
27 Active stage III melanoma or metastatic melanoma (stage IV) patients were excluded as they  
28 have different psychosocial needs to stage 0/I/II patients, where the melanoma has been  
29 confined to a primary tumour only.  
30  
31  
32  
33  
34  
35  
36  
37  
38  
39  
40  
41  
42  
43  
44  
45  
46  
47  
48

49 Ethics approval was obtained from all relevant ethics committees. Informed consent was  
50 obtained from all participants prior to study participation.  
51  
52  
53  
54  
55

### 56 *Intervention Arm*

1  
2  
3 The *Melanoma Care Study* had three components: 1) a newly developed psycho-educational  
4 booklet in full colour hardcopy, 2) a freely available Cancer Council booklet, and 3) up to  
5 five telephone-based sessions with a psychologist specifically trained to deliver the  
6  
7 intervention according to protocol. The psycho-educational booklet, *Melanoma: Questions*  
8  
9 *and Answers* was developed by a multidisciplinary team and is comprised of seven modules  
10  
11 and a series of tailored resources: (1) types of melanoma, melanoma diagnosis, and treatment;  
12  
13 (2) factors that may contribute to melanoma risk; (3) information on skin self-examination,  
14  
15 vitamin D and sun protection, as well as question prompts for communication with one's  
16  
17 health care team; (4) emotional and social aspects of melanoma; (5) strategies to assist people  
18  
19 in coping well with melanoma risk; (6) resources to assist people in keeping track of their  
20  
21 melanoma care; and (7) sources for further information and support. The booklet content and  
22  
23 format was pilot tested and revised on the basis of feedback from 19 people with melanoma  
24  
25 and 10 health professionals.  
26  
27  
28  
29  
30

31  
32 The Cancer Council booklet, *Understanding Melanoma* is comprised of easy-to-read  
33  
34 information about melanoma diagnosis, treatment, and emotional and practical issues. The  
35  
36 Cancer Council booklet is heavily focused on diagnosis and treatment information while the  
37  
38 psycho-educational booklet, *Melanoma Questions and Answers* provides more in-depth  
39  
40 information about emotional and behavioural aspects of coping with melanoma,  
41  
42 communicating with one's family and health care team, and managing one's melanoma care.  
43  
44

45  
46 Participants in the intervention group were also offered five telephone-based sessions  
47  
48 with a psychologist, tailored to the needs of each individual participant and designed to  
49  
50 provide *patient-specific* care to address identified difficulties, needs, concerns and goals. The  
51  
52 first three sessions were in close connection to their next full dermatological consultation at  
53  
54 the melanoma high-risk clinic and the next two sessions were in close connection with their  
55  
56 subsequent high-risk clinic appointment approximately six months later. Participants who  
57  
58  
59  
60

1  
2  
3 were not able to identify specific difficulties, needs or goals were offered the option of  
4  
5 limiting their participation to the first three sessions. The telephone-based sessions were  
6  
7 underpinned by the core principles of brief psychodynamically-oriented psychotherapy.<sup>13-15</sup>  
8  
9 The goal of the sessions was to provide empathic, active listening at a deep level so as to try  
10  
11 to understand participants and their experiences, and to assist participants in developing  
12  
13 healthy emotional, cognitive and behavioural coping responses.<sup>16</sup> Psychosocial care planning  
14  
15 and referrals for further information, support and clinical care were also provided, as  
16  
17 appropriate. A manual was developed by a team of psycho-oncologists with extensive  
18  
19 experience in the care of people with melanoma (NK, SM, PB), to guide the psychologists  
20  
21 providing the intervention on a session-by-session basis (see Table 1). The psychologists  
22  
23 followed the general principles outlined in the manual, whilst tailoring the intervention to the  
24  
25 specific circumstances, needs, goals and characteristics of individual participants. The  
26  
27 psychologists were trained and did also received weekly supervision by one of the senior  
28  
29 author (NK).  
30  
31  
32  
33

### 34 35 *Control Arm*

36  
37 Participants in the control arm received usual care, which consisted of their usual melanoma  
38  
39 high-risk clinic appointments and a copy of the Cancer Council booklet. A blank notepad was  
40  
41 also included in the study package in order to keep the size of the package consistent with  
42  
43 that received by the intervention group.  
44  
45

### 46 47 *Procedures*

48  
49 Baseline data were collected using paper- or web-based questionnaires, as preferred by  
50  
51 participants. Randomisation was performed by a statistician at the NHMRC Clinical Trials  
52  
53 Centre, The University of Sydney, and the statistician was blind to the identity of  
54  
55 participants. Once randomisation had occurred, the research coordinator sent study packs to  
56  
57  
58  
59  
60

1  
2  
3 participants and as such was not blinded. The research coordinator analysed the data;  
4  
5 however, she was not involved in patient care, intervention delivery, or assessment of  
6  
7 participant outcomes (which were self-reported). Clinicians at the High Risk Melanoma  
8  
9 Clinics were not informed of which patients were participating in the study, nor the group to  
10  
11 which participants had been randomised; however, it is possible that clinicians became aware  
12  
13 because participants were encouraged to take the psycho-educational booklet to their  
14  
15 dermatological appointment for discussion and to use the various tools provided within the  
16  
17 booklet.  
18  
19

20  
21 Participants in the intervention arm received the intervention over a one-month period  
22  
23 (if receiving three telephone-based psychology sessions) or a six-month period (if receiving  
24  
25 five sessions). Both the psycho-educational and Cancer Council booklets were sent to  
26  
27 participants two weeks before their usual six-monthly high-risk clinic appointment, at which  
28  
29 a complete dermatological examination was undertaken. For people who received three  
30  
31 sessions, these occurred one week before, one week after, and three weeks after this clinic  
32  
33 appointment. People who received five sessions participated in two additional sessions; the  
34  
35 fourth occurred one week before their subsequent high-risk clinic appointment and the fifth  
36  
37 occurred the following week. Two psychologists received extensive training in intervention  
38  
39 delivery prior to trial commencement.<sup>12</sup> With participants' permission, all sessions were  
40  
41 audio-taped and early sessions were reviewed by the clinical psychology supervisor (NK),  
42  
43 who also provided weekly supervision during which sessions were discussed in-depth.  
44  
45  
46  
47 Participants randomised to the control arm received the Cancer Council booklet two weeks  
48  
49 before their six-monthly high-risk clinic appointment.  
50  
51

#### 52 53 54 *Measures*



1  
2  
3 Perceptions of the newly developed intervention and usual care were evaluated using the  
4  
5 following purposely-designed items:  
6

- 7  
8 1. *Intervention acceptability and perceived benefits.* Six months after study enrolment,  
9  
10 intervention participants rated their satisfaction with, and perceived benefit of, the  
11  
12 psychology sessions, the psycho-educational booklet and the Cancer Council booklet,  
13  
14 while control participants rated the Cancer Council booklet only. Participants also  
15  
16 indicated any behavioural changes they experienced following their participation in  
17  
18 the study (e.g., find the emotional support to cope with melanoma, talk more openly  
19  
20 with my doctor at the high-risk clinic), using a 5-point scale from “strongly agree” to  
21  
22 “strongly disagree”. Participants in both arms rated the overall quality of the  
23  
24 information and support received, and if they would recommend the intervention to  
25  
26 other melanoma patients. Participants were also provided space to provide qualitative  
27  
28 feedback if they wishes.  
29  
30
- 31  
32 2. *Participants’ preferences.* Participants were offered a choice in the number of  
33  
34 sessions (between three and five) they would engage in. Data on participants’  
35  
36 preferences, as well as the duration and timing of sessions were collected to inform  
37  
38 the most feasible model upon which to design a larger trial.  
39  
40
- 41  
42 3. *Adherence to intervention guidelines.* The proportion of participants who attended the  
43  
44 telephone-based psychology sessions was recorded, as well as the number of sessions  
45  
46 attended.  
47
- 48  
49 4. *Feasibility issues.* Difficulties, barriers, and resources associated with intervention  
50  
51 implementation were also systematically recorded by the psychologists and the  
52  
53 research team throughout the pilot.  
54  
55  
56  
57  
58  
59  
60

1  
2  
3 *Demographic and medical characteristics:* At baseline, age, gender, education level, marital  
4 status, number of children were assessed. Health literacy was also assessed using two  
5 validated items.<sup>17,18</sup> Medical characteristics (e.g. number of melanomas, stage of each  
6 melanoma at diagnosis, time since first and last melanoma, melanoma treatment) were  
7 collected from medical records.  
8  
9

### 10 11 12 13 14 15 16 *Statistical analysis*

17  
18 A total sample size of 24 participants was deemed sufficient for refining the study protocol  
19 and assessing feasibility of the psycho-educational intervention, to inform the larger  
20 randomised controlled trial. Guidelines<sup>19</sup> suggest that small sample sizes may be appropriate  
21 for demonstrating the ability to execute a specific research protocol, or for testing  
22 acceptability and engagement with a new intervention, and these were the objectives of the  
23 present pilot study. Descriptive statistics were used to summarise sample characteristics and  
24 feasibility outcomes. Being a pilot study, the small sample precluded use of inferential  
25 statistics; thus, mean scores and standard deviations (including the standardised mean  
26 difference at each time point as a measure of effect size) were used to compare groups. A  
27 priori feasibility objectives were based on our previous experience: >30% consent, <15% lost  
28 to follow-up per group, 80% engagement rate (i.e., participation in all scheduled telephone  
29 sessions). Acceptability objectives were: average satisfaction scores  $\geq 7/10$ , <15% negative  
30 qualitative responses within the questionnaire. All analyses were performed using SAS v9.3  
31 (SAS Institute, Cary, North Carolina, USA).  
32  
33  
34  
35  
36  
37  
38  
39  
40  
41  
42  
43  
44  
45  
46  
47  
48  
49  
50  
51  
52

## 53 **Results**

### 54 *Sample characteristics*

1  
2  
3 Twelve participants were randomly assigned to the treatment arm and 12 to the control (Table  
4  
5 2). One intervention participant withdrew from the study after one psychology session, as he  
6  
7 felt the intervention would not benefit him. The intervention group comprised eight men and  
8  
9 four women, with a mean age of 57 years ( $SD=14$ ), and a median melanoma Breslow  
10  
11 thickness of 0.78mm (range 0.3-2.95mm). The control group comprised six men and six  
12  
13 women, with a mean age of 61 years ( $SD=14$ ), and a median Breslow thickness of 1.3mm  
14  
15 (range 0.3-3.5mm). For both groups, superficial spreading melanoma was the most common  
16  
17 histopathological subtype.  
18  
19

### 20 21 22 23 *Acceptability*

24  
25 Four out of eleven participants in the intervention group reported reading the psycho-  
26  
27 educational booklet, *Melanoma: Questions and Answers*, from ‘cover to cover’, 1/11 ‘quite  
28  
29 thoroughly’, 4/11 ‘only for parts they found relevant’, and 1/11 ‘briefly’. The Cancer Council  
30  
31 booklet was read from ‘cover to cover’ by 3/11 intervention participants versus 2/12 control  
32  
33 participants; ‘quite thoroughly’ (2/11 versus 4/12); only for parts they found relevant (4/11  
34  
35 versus 3/12) and ‘briefly’ (2/11 versus 3/12). Ratings for different components of the  
36  
37 intervention are shown in Table 3.  
38  
39  
40  
41  
42

### 43 44 *Satisfaction*

45  
46 Intervention participants rated the intervention highly in terms of perceived satisfaction and  
47  
48 benefits, particularly the psychology sessions (perceived satisfaction and benefits both mean=  
49  
50 9.3 out of a possible 10,  $SD=2.4$ ) and the psycho-educational booklet (both mean=8.8,  
51  
52  $SD=1.0$ ). Intervention participants rated the difficulty of reading both booklets as not at all  
53  
54 difficult (mean =1.7,  $SD=3.2$  for both). The control arm rated the Cancer Council booklet for  
55  
56  
57  
58  
59  
60

1  
2  
3 perceived satisfaction (mean = 7.2, SD=2.1), perceived benefit (mean = 6.7, SD=2.2), and  
4  
5 perceived difficulty (mean = 2.0, SD=2.7). Most intervention participants (7/11) provided  
6  
7 qualitative feedback on the benefits they experienced through taking part in the intervention.  
8  
9 These included: having an opportunity to share one's fears and discuss issues in depth,  
10  
11 feeling understood by the psychologist, having positive experiences acknowledged, and  
12  
13 improved communication with their doctor. Table 4 summarises all themes and provides  
14  
15 sample quotes from participants.  
16  
17  
18  
19

#### 20 21 *Ratings of the psycho-educational booklet, Melanoma: Questions and Answers*

22  
23 All participants in the intervention group found the information in the psycho-educational  
24  
25 booklet on different types of melanoma, risk of developing melanoma (presented as  
26  
27 pictographs), skin self-examination, and sun protection 'quite' or 'very helpful'. Nine of the  
28  
29 11 participants ) found the information on genetics and family history, vitamin D, how  
30  
31 melanoma can affect the way people feel, coping strategies, and living with the fear that  
32  
33 melanoma may come back 'quite' or 'very helpful'.  
34  
35

36  
37 Participants also rated the tools provided in the booklet highly. The tool on how to  
38  
39 perform a skin self-examination was perceived as most helpful (9/11), followed by the tool  
40  
41 about the UV index (8/11). The least helpful tool was the SunSmart telephone application  
42  
43 designed to provide sun protection and exposure information across Australia (3/11). The  
44  
45 majority of participants (9/11) agreed or strongly agreed that participation in the study had  
46  
47 helped them to learn more about the recommended frequency of skin examinations, and how  
48  
49 to find the information to assist in coping with melanoma. Most participants (8/11) reported  
50  
51 that participation in the intervention helped them talk more openly with their doctor at their  
52  
53 high-risk clinic appointment.  
54  
55  
56  
57  
58  
59  
60

### Ratings of the Cancer Council booklet, Understanding Melanoma

The Cancer Council booklet was perceived as a good source of medical information and reassurance that supplemented information from their doctors (Table 3). One participant in the intervention group (woman, MS353) stated that she “*had read the [Cancer Council] book before.*” Nine participants in the control group commented on the benefits they gained from reading the booklet.

### Difficulties

When asked about difficulties or challenges associated with the intervention, four intervention participants identified difficulties discussing their concerns with a psychologist; one participant [man, MS282] reported “*I’ve usually tried to avoid thinking about melanoma rather than being prepared to discuss the subject so initially at least, the study was a little uncomfortable.*” Another participant [woman, MS155] found “*the telephone session a little intense. Found the questions that were asked/discussed during the session raised issues/concerns that I had not really thought of before the session.*” In the control group, one participant [man, MS223] described the information provided in the Cancer Council booklet as “*confronting*”.

### Quality of information and support provided throughout the trial

The mean score for the quality of information as rated by the intervention group was 4.6 out of a possible 5 (SD=0.9) and 4.2 (SD=1.2) for the control group. The mean score for the support given was 4.7 (SD=0.9) by the intervention arm and 4.2 (SD=1.4) by the controls. Ten out of 11 participants in the intervention group reported that they would recommend the program to other melanoma patients and nine out of 12 participants in the control group would recommend the Cancer Council booklet.

1  
2  
3  
4  
5 *Participants' preferences for three or five telephone-based sessions with a psychologist*

6  
7 Of the 11 participants who completed the intervention, six preferred to receive three  
8 psychology sessions and five preferred five sessions. Mean perceived satisfaction and  
9 benefits were very high irrespective of session number; for participants who received three  
10 sessions, mean satisfaction was 10/10 ( $SD=0$ ) and mean perceived benefits was 9.4/10  
11 ( $SD=0.6$ ) and for participants who received five sessions, mean satisfaction was 8.7 ( $SD=3.3$ )  
12 and mean perceived benefits was 8.7 ( $SD=3.3$ ). On average, participants engaged in three  
13 hours of telephone-based psychological support (mean = 3.0,  $SD=1.4$ ), with a mean session  
14 duration of 50 minutes (range: 9 to 95 minutes).  
15  
16  
17  
18  
19  
20  
21  
22  
23  
24  
25  
26

27 ***Cooperation with and retention in the intervention***

28  
29 All but one intervention participant completed the intervention, and 96% (23/24) of all study  
30 participants completed one- and 6-month questionnaires. Of the five participants who  
31 received all five telephone-based psychology sessions, four had sessions timed around their  
32 high-risk clinic appointments as per protocol, and one participant missed her subsequent  
33 high-risk clinic appointment but still took part in her last psychology session. For the six  
34 participants who received three psychology sessions, five received them as planned and one  
35 participant had this final last session delayed by a week.  
36  
37  
38  
39  
40  
41  
42  
43  
44  
45

46 **Discussion**

47  
48 This pilot randomised controlled trial examined the acceptability and feasibility of a psycho-  
49 educational intervention for people at high-risk of developing another primary melanoma.  
50  
51 Participants in the intervention group reported very high levels of satisfaction with the  
52 intervention, perceived the intervention as highly beneficial, and did not associate it with  
53  
54  
55  
56  
57  
58  
59  
60

1  
2  
3 many difficulties. Melanoma patients in this study highly valued the access to individual  
4  
5 psychological support, particularly in terms of having a health professional with whom to  
6  
7 explore their fears and concerns. This finding is consistent with the results from a recent  
8  
9 qualitative study with melanoma patients that found the most expressed needs were to be  
10  
11 given time to ask questions, and to express melanoma-related concerns and fears.<sup>20</sup>  
12  
13

14 Satisfaction with the newly developed psycho-educational booklet, *Melanoma:  
15  
16 Questions and Answers* was also very high. Participants described receiving information  
17  
18 about diagnosis, staging, and prognosis as highly valuable and as providing a sense of  
19  
20 comfort and confidence. Another Australian study that analysed 29 in-depth interviews with  
21  
22 patients undergoing long-term follow-up after surgical treatment of stage I/II melanoma  
23  
24 found patients highly valued the opportunity to learn about their ongoing prognosis and the  
25  
26 changing risk of recurrence over time.<sup>21</sup> Other patient-reported benefits of our intervention  
27  
28 were positive experiences (such as a sense of comfort, confidence, and feeling ‘worthwhile’),  
29  
30 and improved doctor-patient communication. Nevertheless, participants expressed the need  
31  
32 for ongoing support and were also aware of the future challenges in accessing support when  
33  
34 the study was completed. As to be expected, a small proportion of participants did experience  
35  
36 difficulties related to opening up and discussing personal issues with a psychologist. The  
37  
38 timing of the intervention in relation to high-risk clinic appointments was found to be  
39  
40 feasible, and there was very high study retention (96%).  
41  
42  
43  
44

45 The exclusive recruitment of people who have had early stage melanoma to this study limits  
46  
47 generalisability to people with early-stage-disease and further research is needed to know if  
48  
49 people with advanced melanoma have a similar response to the intervention. Nevertheless,  
50  
51 pilot studies are not designed to evaluate the efficacy of an intervention; the primary purpose  
52  
53 of a pilot is to optimise intervention delivery and to identify the barriers and facilitators to  
54  
55  
56  
57  
58  
59  
60

1  
2  
3 intervention implementation.<sup>22</sup> The highly positive feedback from participants and the  
4  
5 direction of outcomes support wider testing of the intervention.  
6

7  
8 Based on our experience with this pilot study, minor modifications were made to the  
9  
10 protocol for the larger trial. First, we considered it to be more practical and feasible to limit  
11  
12 the number of psychology sessions to three. This decision was made to best meet  
13  
14 participants' needs as well as ensure the trial was feasible in terms of study management,  
15  
16 budget and timelines. Participants in our study who received three sessions still gave high  
17  
18 ratings, and evidence from other studies has showed that brief interventions can be beneficial  
19  
20 for cancer patients.<sup>23,24</sup>  
21  
22  
23  
24

## 25 **Conclusions**

26  
27 This pilot study suggests that tailored psycho-education and psychological support for people  
28  
29 at high-risk of developing another melanoma provided both before and after dermatological  
30  
31 appointments by a highly trained and well supported psychology team was perceived by  
32  
33 participants as needed and highly beneficial.  
34

35  
36 The implementation of a telephone-based psycho-educational program scheduled around  
37  
38 high-risk clinic appointments was highly feasible and acceptable to patients. These findings  
39  
40 inform the possible implementation of this model of psychological support in melanoma  
41  
42 patients' clinical care. We are currently carrying out a larger randomised controlled trial to  
43  
44 evaluate the efficacy and cost-effectiveness of this intervention, comprising the full colour  
45  
46 psycho-educational booklet and three telephone-based sessions with a psychologist,  
47  
48 compared to usual care.<sup>12</sup> These findings will further inform the implementation of this model  
49  
50 of psychological support in melanoma patients' clinical care.  
51  
52  
53  
54  
55  
56  
57  
58  
59  
60



**List of abbreviations**

NHMRC: National Health and Medical Research Council

FCRI: Fear of Cancer Recurrence Inventory

HRC: High Risk Clinic

**Declarations*****Ethics approval and consent to participate***

Approval to conduct the study was granted by the Sydney Local Health District (RPAH zone) Ethics Review Committee (X13-0065 & HREC/13/RPAH/86), the Department of Health and Ageing Human Research Ethics Committee (21/2013), the University of Sydney Human Research Ethics Committee (2013/595), and the Australian Institute of Health and Welfare Ethics Committee (EO 2013/4/58).

***Consent for publication***

Not applicable.

***Availability of data and materials***

Available on request.

***Competing interests***

The authors declare that they have no competing interests.

***Funding***

This work was supported by Cancer Institute NSW Translational Program Grants (G Mann, S Menzies, IDs 05/TPG/1-01 and 10/TPG/1-02), and a Project Grant from *beyondblue: the*

1  
2  
3 *national depression initiative* (N Kasparian, ID 630575). AE Cust was supported by  
4  
5 fellowships from the NHMRC (1063593) and Cancer Institute (#15/CDF/1-14). M Dieng  
6  
7 received a PhD scholarship through a Cancer Institute NSW fellowship to AE Cust and a  
8  
9 Sydney Catalyst Top-Up Research Scholar Award. N Kasparian was supported by a Career  
10  
11 Development Fellowship from the National Health and Medical Research Council of  
12  
13 Australia (NHMRC ID 1049238). RL Morton was supported by a Sidney Sax Early Career  
14  
15 Fellowship (NHMRC ID 1054216). P Butow was supported by a NHMRC Senior Principal  
16  
17 Research Fellowship (ID 1022582).  
18  
19

### 20 *Authors' contributions*

21  
22  
23 **Conception and design:** Kasparian NA, Dieng M, Cust AE, Butow P, Mann GJ, Morton RL,  
24  
25 Menzies S, Costa DSJ.

26  
27 **Provision of study materials or patients:** Kasparian NA, Dieng M, Cust AE, Butow P,  
28  
29 Mann GJ, Morton RL, Menzies S, Costa DSJ, Mireskandari S.

30  
31 **Collection and assembly of data:** Dieng M, Cust AE.

32  
33 **Data analysis and interpretation:** Dieng M, Costa DSJ, Cust AE, Kasparian NA, Morton  
34  
35 RL.

36  
37 **Manuscript writing:** All authors.

38  
39 **Final approval of manuscript:** All authors. FLICTS  
40  
41  
42  
43  
44  
45  
46

### 47 *Acknowledgements*

48  
49 We would like to thank all the men and women who participated in this study and our patient  
50  
51 representative who reviewed the study protocol and booklet; Amelia Smit for assistance with  
52  
53 recruitment and data collection; and Helen Schmid, Leo Raudonikis and staff at each of the  
54  
55 melanoma high risk clinics for facilitating the conduct of this study. This study has been  
56  
57  
58  
59  
60

1  
2  
3 endorsed by the Australia and New Zealand Melanoma Trials Group (ANZMTG) and by the  
4  
5 Scientific Advisory Committee of the Psycho-oncology Co-operative Research Group  
6  
7 (PoCoG).  
8  
9  
10  
11  
12  
13  
14  
15  
16  
17  
18  
19  
20  
21  
22  
23  
24  
25  
26  
27  
28  
29  
30  
31  
32  
33  
34  
35  
36  
37  
38  
39  
40  
41  
42  
43  
44  
45  
46  
47  
48  
49  
50  
51  
52  
53  
54  
55  
56  
57  
58  
59  
60

For peer review only

## References

1. Australian Institute of Health and Welfare: Cancer in Australia: an overview 2014, in AIHW (ed): Cancer series Canberra, AIHW, 2014
2. Beutel ME, Fischbeck S, Binder H, et al: Depression, anxiety and quality of life in long-term survivors of malignant melanoma: a register-based cohort study. PLoS One 10:e0116440, 2015
3. McLoone J, Watts K, Menzies S, et al: When the risks are high: psychological adjustment among melanoma survivors at high risk of developing new primary disease. Qual Health Res 22:1102-13, 2012
4. Loquai C, Scheurich V, Syring N, et al: Screening for distress in routine oncological care-a survey in 520 melanoma patients. PLoS One 8:e66800, 2013
5. Francken AB, Bastiaannet E, Hoekstra HJ: Follow-up in patients with localised primary cutaneous melanoma. Lancet Oncol 6:608-21, 2005
6. Kasparian NA: Psychological stress and melanoma: are we meeting our patients' psychological needs? Clin Dermatol 31:41-6, 2013
7. NHMRC Clinical Practice Guidelines for the Management of Melanoma in Australia and New Zealand., in Cancer Council Australia and Australian Cancer Network, Wellington (ed): 2008
8. Pflugfelder A, Kochs C, Blum A, et al: Malignant Melanoma S3-Guideline "Diagnosis, Therapy and Follow-up of Melanoma". Journal Der Deutschen Dermatologischen Gesellschaft 11:1-116, 2013
9. McLoone J, Menzies S, Meiser B, et al: Psycho-educational interventions for melanoma survivors: a systematic review. Psychooncology 22:1444-56, 2013

- 1  
2  
3 10. Costa DS, Dieng M, Cust AE, et al: Psychometric properties of the Fear of  
4  
5 Cancer Recurrence Inventory: an item response theory approach. *Psychooncology*, 2015  
6
- 7 11. Moloney FJ, Guitera P, Coates E, et al: Detection of primary melanoma in  
8  
9 individuals at extreme high risk: a prospective 5-year follow-up study. *JAMA Dermatol*  
10  
11 150:819-27, 2014  
12
- 13 12. Dieng M, Kasparian NA, Morton RL, et al: The Melanoma care study:  
14  
15 protocol of a randomised controlled trial of a psycho-educational intervention for melanoma  
16  
17 survivors at high risk of developing new primary disease. *BMC Psychol* 3:23, 2015  
18  
19
- 20 13. Abbass A, Kisely S, Kroenke K: Short-term psychodynamic psychotherapy  
21  
22 for somatic disorders. Systematic review and meta-analysis of clinical trials. *Psychother*  
23  
24 *Psychosom* 78:265-74, 2009  
25  
26
- 27 14. Blagys MD, Hilsenroth MJ: Distinctive activities of cognitive-behavioral  
28  
29 therapy. A review of the comparative psychotherapy process literature. *Clin Psychol Rev*  
30  
31 22:671-706, 2002  
32  
33
- 34 15. Shedler J: The efficacy of psychodynamic psychotherapy. *Am Psychol* 65:98-  
35  
36 109, 2010  
37
- 38 16. De Jong PaIKB: *Interviewing for solutions*. CA: Wadsworth Group., 2002  
39
- 40 17. Williams MV, Parker RM, Baker DW, et al: Inadequate functional health  
41  
42 literacy among patients at two public hospitals. *JAMA* 274:1677-82, 1995  
43  
44
- 45 18. Chew LD, Griffin JM, Partin MR, et al: Validation of screening questions for  
46  
47 limited health literacy in a large VA outpatient population. *J Gen Intern Med* 23:561-6, 2008  
48
- 49 19. Moore CG, Carter RE, Nietert PJ, et al: Recommendations for planning pilot  
50  
51 studies in clinical and translational research. *Clin Transl Sci* 4:332-7, 2011  
52  
53  
54  
55  
56  
57  
58  
59  
60

- 1  
2  
3           20.     Stamataki Z, Brunton L, Lorigan P, et al: Assessing the impact of diagnosis  
4 and the related supportive care needs in patients with cutaneous melanoma. Support Care  
5 Cancer 23:779-89, 2015  
6  
7  
8  
9           21.     Morton RL, Rychetnik L, McCaffery K, et al: Patients' perspectives of long-  
10 term follow-up for localised cutaneous melanoma. Eur J Surg Oncol 39:297-303, 2013  
11  
12           22.     Kistin C, Silverstein M: Pilot Studies: A Critical but Potentially Misused  
13 Component of Interventional Research. JAMA 314:1561-2, 2015  
14  
15           23.     Shapiro DA, Barkham M, Stiles WB, et al: Time is of the essence: A selective  
16 review of the fall and rise of brief therapy research. Psychol Psychother 76:211-35, 2003  
17  
18           24.     Trask PC, Paterson AG, Griffith KA, et al: Cognitive-behavioral intervention  
19 for distress in patients with melanoma: comparison with standard medical care and impact on  
20 quality of life. Cancer 98:854-64, 2003  
21  
22  
23  
24  
25  
26  
27  
28  
29  
30  
31  
32  
33  
34  
35  
36  
37  
38  
39  
40  
41  
42  
43  
44  
45  
46  
47  
48  
49  
50  
51  
52  
53  
54  
55  
56  
57  
58  
59  
60

**Table 1: Description of the five telephone-based sessions with a psychologist.**

| Telephone Session      | Session Goals                                                                                                                                                                                                                                                                                                                                                                                                                                                                                                                                                                                                                                                                                                                                                                                       | Schedule                                                                               | Duration         |
|------------------------|-----------------------------------------------------------------------------------------------------------------------------------------------------------------------------------------------------------------------------------------------------------------------------------------------------------------------------------------------------------------------------------------------------------------------------------------------------------------------------------------------------------------------------------------------------------------------------------------------------------------------------------------------------------------------------------------------------------------------------------------------------------------------------------------------------|----------------------------------------------------------------------------------------|------------------|
| <i>Booking session</i> | <ol style="list-style-type: none"> <li>1. Psychologist introduction</li> <li>2. Check that both booklets have been received</li> <li>3. Check the person's understanding of the intervention and what is involved to ensure informed consent</li> <li>4. Answer any questions the participant may have about the intervention and what can be offered</li> <li>5. Discuss confidentiality and psychologists' duty of care</li> <li>6. Discuss the audio-taping of sessions and request the person's permission</li> <li>7. Schedule and assist the person in preparing for Session 1</li> </ol>                                                                                                                                                                                                     | One week before the first session                                                      | Up to 10 minutes |
| <i>Session 1</i>       | <ol style="list-style-type: none"> <li>8. Allow the participant an opportunity to begin the session</li> <li>9. Begin to establish a therapeutic relationship</li> <li>10. Carry out a psychological assessment, including an assessment of the person's supportive care needs in relation to melanoma</li> <li>11. Assist the participant in setting goals for their involvement in the program</li> <li>12. Assist the participant in using the booklets and tools provided</li> <li>13. Explore the participant's thoughts and feelings about their upcoming high-risk clinic appointment, and assess and discuss any concerns regarding appointment</li> <li>14. Check to see how the participant experienced the session and if any modifications need to be thought about together</li> </ol> | One week before patients' 6 monthly dermatological appointment at the high-risk clinic | Up to 90 minutes |
| <i>Session 2</i>       | <ol style="list-style-type: none"> <li>1. Allow the participant an opportunity to begin the session</li> <li>2. Explore the participant's experience of their dermatological appointment and whether they used</li> </ol>                                                                                                                                                                                                                                                                                                                                                                                                                                                                                                                                                                           | One week after patients' 6 monthly dermatological appointment at the                   | Up to 50 minutes |

|                   |                                                                                                                                                                                                                                                  |                                                                                                   |                  |
|-------------------|--------------------------------------------------------------------------------------------------------------------------------------------------------------------------------------------------------------------------------------------------|---------------------------------------------------------------------------------------------------|------------------|
|                   | the booklets in the consultation with their doctor                                                                                                                                                                                               | high-risk clinic                                                                                  |                  |
|                   | 3. Continue to explore participant's goals, difficulties or concerns                                                                                                                                                                             |                                                                                                   |                  |
|                   | 4. Respond to any new difficulties or concerns                                                                                                                                                                                                   |                                                                                                   |                  |
|                   | 5. Check to see how the participant is experiencing the sessions and if any modifications need to be thought about together                                                                                                                      |                                                                                                   |                  |
| <i>Session 3</i>  | 1. Allow the participant an opportunity to begin the session                                                                                                                                                                                     | Three weeks after patients' 6 monthly dermatological appointment at the high-risk clinic          | Up to 50 minutes |
|                   | 2. Continue to build on the relationship with the participant                                                                                                                                                                                    |                                                                                                   |                  |
|                   | 3. Continue exploring the participant's identified goals, difficulties or concerns                                                                                                                                                               |                                                                                                   |                  |
|                   | 4. Respond to any new difficulties or concerns                                                                                                                                                                                                   |                                                                                                   |                  |
| <i>Session 4*</i> | 1. Allow the participant an opportunity to begin the session                                                                                                                                                                                     | One week before patient's subsequent 6 monthly dermatological appointment at the high-risk clinic | Up to 50 minutes |
|                   | 2. Continue to build on the relationship with the participant                                                                                                                                                                                    |                                                                                                   |                  |
|                   | 3. Summarise what has been explored during the three previous sessions                                                                                                                                                                           |                                                                                                   |                  |
|                   | 4. Explore the participant's thoughts and feelings about their upcoming high-risk clinic appointment and, if appropriate, how they could use their booklets in the consultation                                                                  |                                                                                                   |                  |
|                   | 5. Continue exploring the participant's identified goals, difficulties or concerns<br>Respond to any new difficulties or concerns<br>Explore the participant's feelings about coming to the end of the program and prepare for the final session |                                                                                                   |                  |
| <i>Session 5*</i> | 1. Allow the participant an opportunity to begin the session                                                                                                                                                                                     | One week after patient's subsequent 6 monthly dermatological appointment at the high-risk clinic  | Up to 50 minutes |
|                   | 2. Summarise what has been explored during the four previous sessions                                                                                                                                                                            |                                                                                                   |                  |
|                   | 3. Explore the participant's experience of their high-risk clinic appointment                                                                                                                                                                    |                                                                                                   |                  |
|                   | 4. Respond to any new difficulties or concerns                                                                                                                                                                                                   |                                                                                                   |                  |
|                   | 5. Explore the participant's feelings about coming to the end of the program and prepare for the                                                                                                                                                 |                                                                                                   |                  |



---

final session

6. Provide referral pathways for psychological treatment or psychosocial support, as needed

7.

---

\* The 4<sup>th</sup> and 5<sup>th</sup> sessions were omitted for participants who chose 3 sessions.

For peer review only

1  
2  
3  
4  
5  
6  
7  
8  
9  
10  
11  
12  
13  
14  
15  
16  
17  
18  
19  
20  
21  
22  
23  
24  
25  
26  
27  
28  
29  
30  
31  
32  
33  
34  
35  
36  
37  
38  
39  
40  
41  
42  
43  
44  
45  
46  
47  
48  
49  
50  
51  
52  
53  
54  
55  
56  
57  
58  
59  
60

For peer review only

Table 2: Demographic and clinical characteristics of the sample.

| Characteristics                     | Intervention<br>N = 12 | Control<br>N = 12 |
|-------------------------------------|------------------------|-------------------|
|                                     | N (%) or Mean (SD)     |                   |
| <b>Gender</b>                       |                        |                   |
| Male                                | 8 (67%)                | 6 (50%)           |
| Female                              | 4 (33%)                | 6 (50%)           |
| <b>Age at baseline</b>              |                        |                   |
| Mean, SD                            | 56.7 (14.0)            | 61.0 (10.5)       |
| <b>Area</b>                         |                        |                   |
| Metropolitan                        | 7 (58%)                | 7 (58%)           |
| Regional                            | 4 (33%)                | 5 (42%)           |
| Rural                               | 1 (8%)                 | 0 (0%)            |
| <b>Country of birth</b>             |                        |                   |
| Australia                           | 11 (92%)               | 11 (92%)          |
| Other                               | 1 (8%)                 | 1 (8%)            |
| <b>Marital status</b>               |                        |                   |
| Married                             | 11 (92%)               | 8 (72.7%)         |
| Other                               | 1 (8%)                 | 3 (27.3%)         |
| <b>Children</b>                     |                        |                   |
| Yes                                 | 11 (92%)               | 8 (67%)           |
| No                                  | 1 (8%)                 | 4 (33%)           |
| <b>Highest level of education</b>   |                        |                   |
| No tertiary education               | 9 (75%)                | 8 (67%)           |
| University                          | 3 (25%)                | 3 (25%)           |
| Other                               | 0                      | 1 (8%)            |
| <b>Number of previous melanomas</b> | 3.3 (2.9)              | 2.3 (1.9)         |
| <b>Most recent melanoma subtype</b> |                        |                   |
| Superficial spreading melanoma      | 9 (75%)                | 4 (40%)           |
| In situ                             | 2 (17%)                | 2 (20%)           |
| Nodular                             | 0                      | 2 (20%)           |
| Melanoma not classified             | 1 (8%)                 | 2 (20%)           |
| <b>Breslow thickness (mm)</b>       | 0.78 (0.3 to 2.9)      | 1.3 (0.3 to 3.5)  |

1  
2  
3  
4  
5  
6  
7  
8  
9  
10  
11  
12  
13  
14  
15  
16  
17  
18  
19  
20  
21  
22  
23  
24  
25  
26  
27  
28  
29  
30  
31  
32  
33  
34  
35  
36  
37  
38  
39  
40  
41  
42  
43  
44  
45  
46  
47  
48  
49

**Table 3: Acceptability ratings for different components of the Melanoma Care Study**

|                                             | Response options                                | Intervention (N=11)<br>Mean (SD) | Control (N=12)<br>Mean (SD) |
|---------------------------------------------|-------------------------------------------------|----------------------------------|-----------------------------|
| <b>Satisfaction with:</b>                   |                                                 |                                  |                             |
| -                                           | Booklet, <i>Melanoma: Questions and Answers</i> | 8.8 (1.0)                        |                             |
| -                                           | Booklet, <i>Understanding Melanoma</i>          | 9.0 (1.1)                        | 7.2 (2.1) *                 |
| -                                           | Telephone-based psychology sessions             | 9.3 (2.4)                        |                             |
| -                                           | Overall program                                 | 8.7 (2.2)                        |                             |
| <b>Benefit of:</b>                          |                                                 |                                  |                             |
| -                                           | Booklet, <i>Melanoma: Questions and Answers</i> | 8.9 (1.2)                        |                             |
| -                                           | Booklet, <i>Understanding Melanoma</i>          | 8.8 (1.2)                        | 6.7 (2.2) *                 |
| -                                           | Telephone-based psychology sessions             | 9.3 (2.4)                        |                             |
| -                                           | Overall program                                 | 8.6 (2.1)                        |                             |
| -                                           |                                                 |                                  |                             |
| <b>Difficulty of:</b>                       |                                                 |                                  |                             |
| -                                           | Booklet, <i>Melanoma: Questions and Answers</i> | 1.7 (3.2)                        |                             |
| -                                           | Booklet, <i>Understanding Melanoma</i>          | 1.7 (3.2)                        | 2.0 (2.7) *                 |
| -                                           | Telephone-based psychology sessions             | 1.1 (2.4)                        |                             |
| -                                           | Overall program                                 | 1.1 (2.1)                        |                             |
| <b>Quality of:</b>                          |                                                 |                                  |                             |
| -                                           | Information                                     | 4.6 (0.9)                        | 4.17 (1.2)                  |
| -                                           | Support                                         | 4.7 (0.9)                        | 3.83 (1.4)                  |
| <b>Recommend to other melanoma patients</b> |                                                 |                                  |                             |
| -                                           | Yes                                             | 10 (91%)                         | 9 (75%)                     |
| -                                           | No                                              | 0                                | 0                           |
| -                                           | Unsure                                          | 1 (9%)                           | 3 (25%)                     |

\* For the control group, these questions only applied to the Cancer Council booklet.

**Table 4: Summary of participants' views on the perceived benefits of the Melanoma Care Study.**

| <i>Major themes</i>                                     | <i>Participant's ID<sup>#</sup></i> | <i>Participant quotations</i>                                                                                                                                                                                                                                                                                                             |
|---------------------------------------------------------|-------------------------------------|-------------------------------------------------------------------------------------------------------------------------------------------------------------------------------------------------------------------------------------------------------------------------------------------------------------------------------------------|
| An opportunity to share one's fears and feel understood | WP1                                 | <i>Cancer can be lonely and frightening and this allowed me to express all of those fears before and after appointments and about the impact on my life. This had never happened before. Other patients may not have anyone to talk to either. This was the best opportunity and I was in a dark place - you feel so much more alive.</i> |
|                                                         | MP1                                 | <i>I feel sharing private fears helped me deal with these issues.</i>                                                                                                                                                                                                                                                                     |
|                                                         | WP2                                 | <i>It helps to talk to someone who understands when you get your first melanoma.</i>                                                                                                                                                                                                                                                      |
| An opportunity to explore one's experiences in depth    | WP3                                 | <i>Engaging in a conversation with the psychologist made me realise that I still needed to address particular issues which I thought I had dealt with but obviously had not.</i>                                                                                                                                                          |
|                                                         | MP1                                 | <i>I felt that the sessions with my psychologist were the first real extended discussions I've had in relation to my melanoma risk in over 20 years of melanoma care. I was very satisfied at the end of the sessions because I felt I'd been able to share a burden and get some sensible advice.</i>                                    |
| Positive experiences                                    | MP2                                 | <i>Education gives understanding and comfort.</i>                                                                                                                                                                                                                                                                                         |
|                                                         | WP1                                 | <i>I feel happier for having someone to talk to about it. My psychologist made me think about taking control of my life and I feel I have been given the skills to understand and manage my fear and to feel worthwhile.</i>                                                                                                              |
|                                                         | MP3                                 | <i>Reinforced my confidence</i>                                                                                                                                                                                                                                                                                                           |
|                                                         | MP4                                 | <i>The psychologist assisted greatly with dealing with emotional feelings.</i>                                                                                                                                                                                                                                                            |
| Improved doctor-patient communication                   | MP1                                 | <i>I was given suggested strategies for dealing with negative thoughts about my melanoma risk. I was encouraged to discuss longstanding and new concerns with the high-risk clinic doctor. I felt that the psychologist was genuinely interested in helping me address concerns.</i>                                                      |
| Good source of medical information                      | WP4                                 | <i>Understand what happens after diagnosis, what to expect and support options available.</i>                                                                                                                                                                                                                                             |
|                                                         | WP5                                 | <i>A clearer understanding of the different stages of melanoma.</i>                                                                                                                                                                                                                                                                       |
| Supplement information from the doctors                 | WP4                                 | <i>I would recommend the booklet because it answers a lot of questions that you would sometimes forget to ask medical staff and you can also refer to it at any time to clarify any areas of confusion.</i>                                                                                                                               |
|                                                         | MP6                                 | <i>If various things are not explained by your GP, the booklet fills that void.</i>                                                                                                                                                                                                                                                       |
| Reassurance                                             | WP6                                 | <i>Statistics on recurrence that helped me feel calmer.</i>                                                                                                                                                                                                                                                                               |
| Requests for continued psychological support            | MP5                                 | <i>I wish the support was ongoing and not just a study and I hope that the study will result in this service eventually being a part of patients' treatment.</i>                                                                                                                                                                          |
|                                                         | MP1                                 | <i>Provide an annual 'catch-up' counselling call.</i>                                                                                                                                                                                                                                                                                     |
| Challenge for future support                            | WP1                                 | <i>The study and help came at the right time and the challenge for me will be to seek the help I may need in the future</i>                                                                                                                                                                                                               |
|                                                         | WP3                                 | <i>I suggest at the beginning of the sessions that patients might find they'd like help and support beyond the study and help them to find a suitable psychologist... I'm not sure how to find someone who might be better for cancer patients.</i>                                                                                       |
|                                                         | WP1                                 | <i>Feeling withdrawn and empty for a few weeks after the counselling stopped for a few months. Knowing it's only a study, even though I've been strongly encouraged to seek support after the study.</i>                                                                                                                                  |

1  
2  
3  
4  
5  
6  
7  
8  
9  
10  
11  
12  
13  
14  
15  
16  
17  
18  
19  
20  
21  
22  
23  
24  
25  
26  
27  
28  
29  
30  
31  
32  
33  
34  
35  
36  
37  
38  
39  
40  
41  
42  
43  
44  
45  
46  
47  
48  
49

# WP: Woman participant; MP: male participant.

For peer review only

## CONSORT checklist of information to include when reporting a pilot trial\*

| Section/topic and item No  | Standard checklist item                                                                                                               | Extension for pilot trials                                                                                                                                   | Page No where item is reported |
|----------------------------|---------------------------------------------------------------------------------------------------------------------------------------|--------------------------------------------------------------------------------------------------------------------------------------------------------------|--------------------------------|
| <b>Title and abstract</b>  |                                                                                                                                       |                                                                                                                                                              |                                |
| 1a                         | Identification as a randomised trial in the title                                                                                     | Identification as a pilot or feasibility randomised trial in the title                                                                                       | Page 1                         |
| 1b                         | Structured summary of trial design, methods, results, and conclusions (for specific guidance see CONSORT for abstracts)               | Structured summary of pilot trial design, methods, results, and conclusions (for specific guidance see CONSORT abstract extension for pilot trials)          | Page 3                         |
| <b>Introduction</b>        |                                                                                                                                       |                                                                                                                                                              |                                |
| Background and objectives: |                                                                                                                                       |                                                                                                                                                              |                                |
| 2a                         | Scientific background and explanation of rationale                                                                                    | Scientific background and explanation of rationale for future definitive trial, and reasons for randomised pilot trial                                       | Pages 5-6                      |
| 2b                         | Specific objectives or hypotheses                                                                                                     | Specific objectives or research questions for pilot trial                                                                                                    | Page 6                         |
| <b>Methods</b>             |                                                                                                                                       |                                                                                                                                                              |                                |
| Trial design:              |                                                                                                                                       |                                                                                                                                                              |                                |
| 3a                         | Description of trial design (such as parallel, factorial) including allocation ratio                                                  | Description of pilot trial design (such as parallel, factorial) including allocation ratio                                                                   | page 6                         |
| 3b                         | Important changes to methods after trial commencement (such as eligibility criteria), with reasons                                    | Important changes to methods after pilot trial commencement (such as eligibility criteria), with reasons                                                     | page 6                         |
| Participants:              |                                                                                                                                       |                                                                                                                                                              |                                |
| 4a                         | Eligibility criteria for participants                                                                                                 |                                                                                                                                                              |                                |
| 4b                         | Settings and locations where the data were collected                                                                                  |                                                                                                                                                              |                                |
| 4c                         |                                                                                                                                       | How participants were identified and consented                                                                                                               | Page 6                         |
| Interventions:             |                                                                                                                                       |                                                                                                                                                              |                                |
| 5                          | The interventions for each group with sufficient details to allow replication, including how and when they were actually administered |                                                                                                                                                              | pages 7-8                      |
| Outcomes:                  |                                                                                                                                       |                                                                                                                                                              |                                |
| 6a                         | Completely defined prespecified primary and secondary outcome measures, including how and when they were assessed                     | Completely defined prespecified assessments or measurements to address each pilot trial objective specified in 2b, including how and when they were assessed | pages 9-11                     |
| 6b                         | Any changes to trial outcomes after the trial commenced, with reasons                                                                 | Any changes to pilot trial assessments or measurements after the pilot trial commenced, with reasons                                                         |                                |
| 6c                         |                                                                                                                                       | If applicable, prespecified criteria used to judge whether, or how, to proceed with future definitive trial                                                  |                                |

## Sample size:

- |    |                                                                              |                                          |                                        |
|----|------------------------------------------------------------------------------|------------------------------------------|----------------------------------------|
| 7a | How sample size was determined                                               | Rationale for numbers in the pilot trial | <i>page 6.<br/>(convenient length)</i> |
| 7b | When applicable, explanation of any interim analyses and stopping guidelines |                                          |                                        |

## Randomisation:

## Sequence generation:

- |    |                                                                                     |                                                                                        |               |
|----|-------------------------------------------------------------------------------------|----------------------------------------------------------------------------------------|---------------|
| 8a | Method used to generate the random allocation sequence                              |                                                                                        | <i>page 9</i> |
| 8b | Type of randomisation; details of any restriction (such as blocking and block size) | Type of randomisation(s); details of any restriction (such as blocking and block size) |               |

## Allocation concealment mechanism:

- |   |                                                                                                                                                                                             |  |                |
|---|---------------------------------------------------------------------------------------------------------------------------------------------------------------------------------------------|--|----------------|
| 9 | Mechanism used to implement the random allocation sequence (such as sequentially numbered containers), describing any steps taken to conceal the sequence until interventions were assigned |  | <i>page 9.</i> |
|---|---------------------------------------------------------------------------------------------------------------------------------------------------------------------------------------------|--|----------------|

## Implementation:

- |    |                                                                                                                 |  |                |
|----|-----------------------------------------------------------------------------------------------------------------|--|----------------|
| 10 | Who generated the random allocation sequence, enrolled participants, and assigned participants to interventions |  | <i>page 9.</i> |
|----|-----------------------------------------------------------------------------------------------------------------|--|----------------|

## Blinding:

- |     |                                                                                                                                 |  |                    |
|-----|---------------------------------------------------------------------------------------------------------------------------------|--|--------------------|
| 11a | If done, who was blinded after assignment to interventions (eg, participants, care providers, those assessing outcomes) and how |  | <i>No blinding</i> |
| 11b | If relevant, description of the similarity of interventions                                                                     |  |                    |

## Analytical methods:

- |     |                                                                                  |                                                                                        |                |
|-----|----------------------------------------------------------------------------------|----------------------------------------------------------------------------------------|----------------|
| 12a | Statistical methods used to compare groups for primary and secondary outcomes    | Methods used to address each pilot trial objective whether qualitative or quantitative | <i>page 11</i> |
| 12b | Methods for additional analyses, such as subgroup analyses and adjusted analyses | Not applicable                                                                         |                |

**Results**

## Participant flow (a diagram is strongly recommended):

- |     |                                                                                                                                                |                                                                                                                                                                                       |                |
|-----|------------------------------------------------------------------------------------------------------------------------------------------------|---------------------------------------------------------------------------------------------------------------------------------------------------------------------------------------|----------------|
| 13a | For each group, the numbers of participants who were randomly assigned, received intended treatment, and were analysed for the primary outcome | For each group, the numbers of participants who were approached and/or assessed for eligibility, randomly assigned, received intended treatment, and were assessed for each objective | <i>Page 12</i> |
| 13b | For each group, losses and exclusions after randomisation, together with reasons                                                               |                                                                                                                                                                                       |                |

## Recruitment:



|                                 |                                                                                                                                                   |                                                                                                                                                                                           |
|---------------------------------|---------------------------------------------------------------------------------------------------------------------------------------------------|-------------------------------------------------------------------------------------------------------------------------------------------------------------------------------------------|
| 14a                             | Dates defining the periods of recruitment and follow-up                                                                                           |                                                                                                                                                                                           |
| 14b                             | Why the trial ended or was stopped                                                                                                                | Why the pilot trial ended or was stopped                                                                                                                                                  |
| <b>Baseline data:</b>           |                                                                                                                                                   |                                                                                                                                                                                           |
| 15                              | A table showing baseline demographic and clinical characteristics for each group                                                                  | Table 1                                                                                                                                                                                   |
| <b>Numbers analysed:</b>        |                                                                                                                                                   |                                                                                                                                                                                           |
| 16                              | For each group, number of participants (denominator) included in each analysis and whether the analysis was by original assigned groups           | For each objective, number of participants (denominator) included in each analysis. If relevant, these numbers should be by randomised group<br>Table 1                                   |
| <b>Outcomes and estimation:</b> |                                                                                                                                                   |                                                                                                                                                                                           |
| 17a                             | For each primary and secondary outcome, results for each group, and the estimated effect size and its precision (such as 95% confidence interval) | For each objective, results including expressions of uncertainty (such as 95% confidence interval) for any estimates. If relevant, these results should be by randomised group<br>Table 4 |
| 17b                             | For binary outcomes, presentation of both absolute and relative effect sizes is recommended                                                       | Not applicable                                                                                                                                                                            |
| <b>Ancillary analyses:</b>      |                                                                                                                                                   |                                                                                                                                                                                           |
| 18                              | Results of any other analyses performed, including subgroup analyses and adjusted analyses, distinguishing prespecified from exploratory          | Results of any other analyses performed that could be used to inform the future definitive trial<br>Table 2<br>Table 3                                                                    |
| <b>Harms:</b>                   |                                                                                                                                                   |                                                                                                                                                                                           |
| 19                              | All important harms or unintended effects in each group (for specific guidance see CONSORT for harms)                                             |                                                                                                                                                                                           |
| 19a                             |                                                                                                                                                   | If relevant, other important unintended consequences                                                                                                                                      |
| <b>Discussion</b>               |                                                                                                                                                   |                                                                                                                                                                                           |
| <b>Limitations:</b>             |                                                                                                                                                   |                                                                                                                                                                                           |
| 20                              | Trial limitations, addressing sources of potential bias, imprecision, and, if relevant, multiplicity of analyses                                  | Pilot trial limitations, addressing sources of potential bias and remaining uncertainty about feasibility<br>Page 18                                                                      |
| <b>Generalisability:</b>        |                                                                                                                                                   |                                                                                                                                                                                           |
| 21                              | Generalisability (external validity, applicability) of the trial findings                                                                         | Generalisability (applicability) of pilot trial methods and findings to future definitive trial and other studies<br>Page 18                                                              |
| <b>Interpretation:</b>          |                                                                                                                                                   |                                                                                                                                                                                           |
| 22                              | Interpretation consistent with results, balancing benefits and harms, and considering other relevant evidence                                     | Interpretation consistent with pilot trial objectives and findings, balancing potential benefits and harms, and considering other relevant evidence<br>Page 18                            |
| 22a                             |                                                                                                                                                   | Implications for progression from pilot to future definitive trial, including any proposed amendments                                                                                     |
| <b>Other information</b>        |                                                                                                                                                   |                                                                                                                                                                                           |

1  
2  
3  
4  
5  
6  
7  
8  
9  
10  
11  
12  
13  
14  
15  
16  
17  
18  
19  
20  
21  
22  
23  
24  
25  
26  
27  
28  
29  
30  
31  
32  
33  
34  
35  
36  
37  
38  
39  
40  
41  
42  
43  
44  
45  
46  
47  
48  
49  
50  
51  
52  
53  
54  
55  
56  
57  
58  
59  
60

Registration:

23

Registration number and name of trial registry

Registration number for pilot trial and name of trial registry

Page 4

Protocol:

24

Where the full trial protocol can be accessed, if available

Where the pilot trial protocol can be accessed, if available

Page 22

Funding:

25

Sources of funding and other support (such as supply of drugs), role of funders

Page 22

26

Ethical approval or approval by research review committee, confirmed with reference number

Page 2

---

\*Here a pilot trial means any randomised study conducted in preparation for a future definitive RCT, where the main objective of the pilot trial is to assess feasibility.

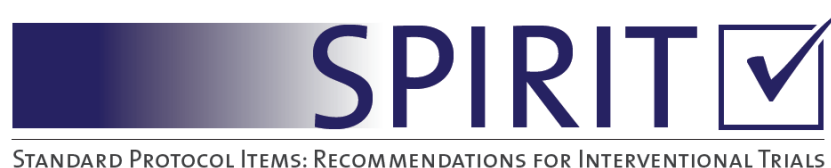

SPIRIT 2013 Checklist: Recommended items to address in a clinical trial protocol and related documents\*

| Section/item                      | Item No | Description                                                                                                                                                                                                                                                                              | Addressed on page number |
|-----------------------------------|---------|------------------------------------------------------------------------------------------------------------------------------------------------------------------------------------------------------------------------------------------------------------------------------------------|--------------------------|
| <b>Administrative information</b> |         |                                                                                                                                                                                                                                                                                          |                          |
| Title                             | 1       | Descriptive title identifying the study design, population, interventions, and, if applicable, trial acronym                                                                                                                                                                             | Page 1_____              |
| Trial registration                | 2a      | Trial identifier and registry name. If not yet registered, name of intended registry                                                                                                                                                                                                     | Page 4_____              |
|                                   | 2b      | All items from the World Health Organization Trial Registration Data Set                                                                                                                                                                                                                 | Page 1_____              |
| Protocol version                  | 3       | Date and version identifier                                                                                                                                                                                                                                                              | Page 2_____              |
| Funding                           | 4       | Sources and types of financial, material, and other support                                                                                                                                                                                                                              | Page 3_____              |
| Roles and responsibilities        | 5a      | Names, affiliations, and roles of protocol contributors                                                                                                                                                                                                                                  | Page 3_____              |
|                                   | 5b      | Name and contact information for the trial sponsor                                                                                                                                                                                                                                       | Page 3_____              |
|                                   | 5c      | Role of study sponsor and funders, if any, in study design; collection, management, analysis, and interpretation of data; writing of the report; and the decision to submit the report for publication, including whether they will have ultimate authority over any of these activities | None_____                |
|                                   | 5d      | Composition, roles, and responsibilities of the coordinating centre, steering committee, endpoint adjudication committee, data management team, and other individuals or groups overseeing the trial, if applicable (see Item 21a for data monitoring committee)                         | ____NA_____              |

|    |                                                           |     |                                                                                                               |                    |
|----|-----------------------------------------------------------|-----|---------------------------------------------------------------------------------------------------------------|--------------------|
| 1  | <b>Introduction</b>                                       |     |                                                                                                               |                    |
| 2  |                                                           |     |                                                                                                               |                    |
| 3  | Background and                                            | 6a  | Description of research question and justification for undertaking the trial, including summary of relevant   | Page 4_____        |
| 4  | rationale                                                 |     | studies (published and unpublished) examining benefits and harms for each intervention                        |                    |
| 5  |                                                           |     |                                                                                                               |                    |
| 6  |                                                           | 6b  | Explanation for choice of comparators                                                                         | Page 3_____        |
| 7  |                                                           |     |                                                                                                               |                    |
| 8  | Objectives                                                | 7   | Specific objectives or hypotheses                                                                             | Page 5-6_____      |
| 9  |                                                           |     |                                                                                                               |                    |
| 10 | Trial design                                              | 8   | Description of trial design including type of trial (eg, parallel group, crossover, factorial, single group), | Page 6_____        |
| 11 |                                                           |     | allocation ratio, and framework (eg, superiority, equivalence, noninferiority, exploratory)                   |                    |
| 12 |                                                           |     |                                                                                                               |                    |
| 13 |                                                           |     |                                                                                                               |                    |
| 14 |                                                           |     |                                                                                                               |                    |
| 15 | <b>Methods: Participants, interventions, and outcomes</b> |     |                                                                                                               |                    |
| 16 |                                                           |     |                                                                                                               |                    |
| 17 | Study setting                                             | 9   | Description of study settings (eg, community clinic, academic hospital) and list of countries where data will | Page 6_____        |
| 18 |                                                           |     | be collected. Reference to where list of study sites can be obtained                                          |                    |
| 19 |                                                           |     |                                                                                                               |                    |
| 20 | Eligibility criteria                                      | 10  | Inclusion and exclusion criteria for participants. If applicable, eligibility criteria for study centres and  | Page 7_____        |
| 21 |                                                           |     | individuals who will perform the interventions (eg, surgeons, psychotherapists)                               |                    |
| 22 |                                                           |     |                                                                                                               |                    |
| 23 | Interventions                                             | 11a | Interventions for each group with sufficient detail to allow replication, including how and when they will be | Page 6_____        |
| 24 |                                                           |     | administered                                                                                                  |                    |
| 25 |                                                           |     |                                                                                                               |                    |
| 26 |                                                           | 11b | Criteria for discontinuing or modifying allocated interventions for a given trial participant (eg, drug dose  | Page 17_____       |
| 27 |                                                           |     | change in response to harms, participant request, or improving/worsening disease)                             |                    |
| 28 |                                                           |     |                                                                                                               |                    |
| 29 |                                                           | 11c | Strategies to improve adherence to intervention protocols, and any procedures for monitoring adherence        | Page 14_____       |
| 30 |                                                           |     | (eg, drug tablet return, laboratory tests)                                                                    |                    |
| 31 |                                                           |     |                                                                                                               |                    |
| 32 |                                                           |     |                                                                                                               |                    |
| 33 |                                                           | 11d | Relevant concomitant care and interventions that are permitted or prohibited during the trial                 | Page 11_____       |
| 34 |                                                           |     |                                                                                                               |                    |
| 35 | Outcomes                                                  | 12  | Primary, secondary, and other outcomes, including the specific measurement variable (eg, systolic blood       | Page 14_____       |
| 36 |                                                           |     | pressure), analysis metric (eg, change from baseline, final value, time to event), method of aggregation (eg, |                    |
| 37 |                                                           |     | median, proportion), and time point for each outcome. Explanation of the clinical relevance of chosen         |                    |
| 38 |                                                           |     | efficacy and harm outcomes is strongly recommended                                                            |                    |
| 39 |                                                           |     |                                                                                                               |                    |
| 40 |                                                           |     |                                                                                                               |                    |
| 41 | Participant timeline                                      | 13  | Time schedule of enrolment, interventions (including any run-ins and washouts), assessments, and visits for   | Page 9, 11, 12____ |
| 42 |                                                           |     | participants. A schematic diagram is highly recommended (see Figure)                                          |                    |
| 43 |                                                           |     |                                                                                                               |                    |
| 44 |                                                           |     |                                                                                                               |                    |

1 Sample size 14 Estimated number of participants needed to achieve study objectives and how it was determined, including Page 17\_\_\_\_\_

2 clinical and statistical assumptions supporting any sample size calculations

3  
4 Recruitment 15 Strategies for achieving adequate participant enrolment to reach target sample size Page 17\_\_\_\_\_

5  
6  
7 **Methods: Assignment of interventions (for controlled trials)**

8  
9 Allocation:

10 Sequence 16a Method of generating the allocation sequence (eg, computer-generated random numbers), and list of any Page 10\_\_\_\_\_

11 generation

12 factors for stratification. To reduce predictability of a random sequence, details of any planned restriction  
13 (eg, blocking) should be provided in a separate document that is unavailable to those who enrol participants  
14 or assign interventions

15  
16 Allocation 16b Mechanism of implementing the allocation sequence (eg, central telephone; sequentially numbered, Page 10\_\_\_\_\_

17 concealment  
18 mechanism

19 opaque, sealed envelopes), describing any steps to conceal the sequence until interventions are assigned

20  
21 Implementation 16c Who will generate the allocation sequence, who will enrol participants, and who will assign participants to Page 10\_\_\_\_\_

22 interventions

23  
24 Blinding (masking) 17a Who will be blinded after assignment to interventions (eg, trial participants, care providers, outcome Page 11\_\_\_\_\_

25 assessors, data analysts), and how

26  
27  
28 17b If blinded, circumstances under which unblinding is permissible, and procedure for revealing a participant's Page 11\_\_\_\_\_

29 allocated intervention during the trial

30  
31  
32 **Methods: Data collection, management, and analysis**

33  
34 Data collection 18a Plans for assessment and collection of outcome, baseline, and other trial data, including any related Page 14-16\_\_\_\_\_

35 methods

36 processes to promote data quality (eg, duplicate measurements, training of assessors) and a description of  
37 study instruments (eg, questionnaires, laboratory tests) along with their reliability and validity, if known.  
38 Reference to where data collection forms can be found, if not in the protocol

39  
40 18b Plans to promote participant retention and complete follow-up, including list of any outcome data to be Page 14-16\_\_\_\_\_

41 collected for participants who discontinue or deviate from intervention protocols

42 Ethics application

|    |                                 |     |                                                                                                                                                                                                                                                                                                                                       |                    |
|----|---------------------------------|-----|---------------------------------------------------------------------------------------------------------------------------------------------------------------------------------------------------------------------------------------------------------------------------------------------------------------------------------------|--------------------|
| 1  | Data management                 | 19  | Plans for data entry, coding, security, and storage, including any related processes to promote data quality (eg, double data entry; range checks for data values). Reference to where details of data management procedures can be found, if not in the protocol                                                                     | Ethics application |
| 2  |                                 |     |                                                                                                                                                                                                                                                                                                                                       |                    |
| 3  |                                 |     |                                                                                                                                                                                                                                                                                                                                       |                    |
| 4  |                                 |     |                                                                                                                                                                                                                                                                                                                                       |                    |
| 5  | Statistical methods             | 20a | Statistical methods for analysing primary and secondary outcomes. Reference to where other details of the statistical analysis plan can be found, if not in the protocol                                                                                                                                                              | Page 17_____       |
| 6  |                                 |     |                                                                                                                                                                                                                                                                                                                                       |                    |
| 7  |                                 |     |                                                                                                                                                                                                                                                                                                                                       |                    |
| 8  |                                 | 20b | Methods for any additional analyses (eg, subgroup and adjusted analyses)                                                                                                                                                                                                                                                              | Page 18_____       |
| 9  |                                 |     |                                                                                                                                                                                                                                                                                                                                       |                    |
| 10 |                                 | 20c | Definition of analysis population relating to protocol non-adherence (eg, as randomised analysis), and any statistical methods to handle missing data (eg, multiple imputation)                                                                                                                                                       | Page 18_____       |
| 11 |                                 |     |                                                                                                                                                                                                                                                                                                                                       |                    |
| 12 |                                 |     |                                                                                                                                                                                                                                                                                                                                       |                    |
| 13 |                                 |     |                                                                                                                                                                                                                                                                                                                                       |                    |
| 14 |                                 |     |                                                                                                                                                                                                                                                                                                                                       |                    |
| 15 | <b>Methods: Monitoring</b>      |     |                                                                                                                                                                                                                                                                                                                                       |                    |
| 16 |                                 |     |                                                                                                                                                                                                                                                                                                                                       |                    |
| 17 | Data monitoring                 | 21a | Composition of data monitoring committee (DMC); summary of its role and reporting structure; statement of whether it is independent from the sponsor and competing interests; and reference to where further details about its charter can be found, if not in the protocol. Alternatively, an explanation of why a DMC is not needed | ___NA_____         |
| 18 |                                 |     |                                                                                                                                                                                                                                                                                                                                       |                    |
| 19 |                                 |     |                                                                                                                                                                                                                                                                                                                                       |                    |
| 20 |                                 |     |                                                                                                                                                                                                                                                                                                                                       |                    |
| 21 |                                 |     |                                                                                                                                                                                                                                                                                                                                       |                    |
| 22 |                                 | 21b | Description of any interim analyses and stopping guidelines, including who will have access to these interim results and make the final decision to terminate the trial                                                                                                                                                               | ___NA_____         |
| 23 |                                 |     |                                                                                                                                                                                                                                                                                                                                       |                    |
| 24 |                                 |     |                                                                                                                                                                                                                                                                                                                                       |                    |
| 25 |                                 |     |                                                                                                                                                                                                                                                                                                                                       |                    |
| 26 | Harms                           | 22  | Plans for collecting, assessing, reporting, and managing solicited and spontaneously reported adverse events and other unintended effects of trial interventions or trial conduct                                                                                                                                                     | ___NA_____         |
| 27 |                                 |     |                                                                                                                                                                                                                                                                                                                                       |                    |
| 28 |                                 |     |                                                                                                                                                                                                                                                                                                                                       |                    |
| 29 | Auditing                        | 23  | Frequency and procedures for auditing trial conduct, if any, and whether the process will be independent from investigators and the sponsor                                                                                                                                                                                           | _____NA_____       |
| 30 |                                 |     |                                                                                                                                                                                                                                                                                                                                       |                    |
| 31 |                                 |     |                                                                                                                                                                                                                                                                                                                                       |                    |
| 32 |                                 |     |                                                                                                                                                                                                                                                                                                                                       |                    |
| 33 | <b>Ethics and dissemination</b> |     |                                                                                                                                                                                                                                                                                                                                       |                    |
| 34 |                                 |     |                                                                                                                                                                                                                                                                                                                                       |                    |
| 35 | Research ethics approval        | 24  | Plans for seeking research ethics committee/institutional review board (REC/IRB) approval                                                                                                                                                                                                                                             | Page 11_____       |
| 36 |                                 |     |                                                                                                                                                                                                                                                                                                                                       |                    |
| 37 |                                 |     |                                                                                                                                                                                                                                                                                                                                       |                    |
| 38 | Protocol amendments             | 25  | Plans for communicating important protocol modifications (eg, changes to eligibility criteria, outcomes, analyses) to relevant parties (eg, investigators, REC/IRBs, trial participants, trial registries, journals, regulators)                                                                                                      | Ethics application |
| 39 |                                 |     |                                                                                                                                                                                                                                                                                                                                       |                    |
| 40 |                                 |     |                                                                                                                                                                                                                                                                                                                                       |                    |
| 41 |                                 |     |                                                                                                                                                                                                                                                                                                                                       |                    |
| 42 |                                 |     |                                                                                                                                                                                                                                                                                                                                       |                    |
| 43 |                                 |     |                                                                                                                                                                                                                                                                                                                                       |                    |
| 44 |                                 |     |                                                                                                                                                                                                                                                                                                                                       |                    |
| 45 |                                 |     |                                                                                                                                                                                                                                                                                                                                       |                    |
| 46 |                                 |     |                                                                                                                                                                                                                                                                                                                                       |                    |
| 47 |                                 |     |                                                                                                                                                                                                                                                                                                                                       |                    |

|    |                               |     |                                                                                                                                                                                                                                                                                     |                     |
|----|-------------------------------|-----|-------------------------------------------------------------------------------------------------------------------------------------------------------------------------------------------------------------------------------------------------------------------------------------|---------------------|
| 1  | Consent or assent             | 26a | Who will obtain informed consent or assent from potential trial participants or authorised surrogates, and how (see Item 32)                                                                                                                                                        | Page 7 & appendix C |
| 2  |                               |     |                                                                                                                                                                                                                                                                                     |                     |
| 3  |                               |     |                                                                                                                                                                                                                                                                                     |                     |
| 4  |                               | 26b | Additional consent provisions for collection and use of participant data and biological specimens in ancillary studies, if applicable                                                                                                                                               | Page 7 & appendix C |
| 5  |                               |     |                                                                                                                                                                                                                                                                                     |                     |
| 6  |                               |     |                                                                                                                                                                                                                                                                                     |                     |
| 7  | Confidentiality               | 27  | How personal information about potential and enrolled participants will be collected, shared, and maintained in order to protect confidentiality before, during, and after the trial                                                                                                | Ethics application  |
| 8  |                               |     |                                                                                                                                                                                                                                                                                     |                     |
| 9  |                               |     |                                                                                                                                                                                                                                                                                     |                     |
| 10 | Declaration of interests      | 28  | Financial and other competing interests for principal investigators for the overall trial and each study site                                                                                                                                                                       | Page 18_____        |
| 11 |                               |     |                                                                                                                                                                                                                                                                                     |                     |
| 12 |                               |     |                                                                                                                                                                                                                                                                                     |                     |
| 13 |                               |     |                                                                                                                                                                                                                                                                                     |                     |
| 14 | Access to data                | 29  | Statement of who will have access to the final trial dataset, and disclosure of contractual agreements that limit such access for investigators                                                                                                                                     | Ethics application  |
| 15 |                               |     |                                                                                                                                                                                                                                                                                     |                     |
| 16 |                               |     |                                                                                                                                                                                                                                                                                     |                     |
| 17 | Ancillary and post-trial care | 30  | Provisions, if any, for ancillary and post-trial care, and for compensation to those who suffer harm from trial participation                                                                                                                                                       | Ethics application  |
| 18 |                               |     |                                                                                                                                                                                                                                                                                     |                     |
| 19 |                               |     |                                                                                                                                                                                                                                                                                     |                     |
| 20 | Dissemination policy          | 31a | Plans for investigators and sponsor to communicate trial results to participants, healthcare professionals, the public, and other relevant groups (eg, via publication, reporting in results databases, or other data sharing arrangements), including any publication restrictions | Ethics application  |
| 21 |                               |     |                                                                                                                                                                                                                                                                                     |                     |
| 22 |                               |     |                                                                                                                                                                                                                                                                                     |                     |
| 23 |                               |     |                                                                                                                                                                                                                                                                                     |                     |
| 24 |                               |     |                                                                                                                                                                                                                                                                                     |                     |
| 25 |                               | 31b | Authorship eligibility guidelines and any intended use of professional writers                                                                                                                                                                                                      | _____NA_____        |
| 26 |                               |     |                                                                                                                                                                                                                                                                                     |                     |
| 27 |                               | 31c | Plans, if any, for granting public access to the full protocol, participant-level dataset, and statistical code                                                                                                                                                                     | Page 18_____        |
| 28 |                               |     |                                                                                                                                                                                                                                                                                     |                     |
| 29 |                               |     |                                                                                                                                                                                                                                                                                     |                     |
| 30 | <b>Appendices</b>             |     |                                                                                                                                                                                                                                                                                     |                     |
| 31 |                               |     |                                                                                                                                                                                                                                                                                     |                     |
| 32 | Informed consent materials    | 32  | Model consent form and other related documentation given to participants and authorised surrogates                                                                                                                                                                                  | _____NA_____        |
| 33 |                               |     |                                                                                                                                                                                                                                                                                     |                     |
| 34 |                               |     |                                                                                                                                                                                                                                                                                     |                     |
| 35 | Biological specimens          | 33  | Plans for collection, laboratory evaluation, and storage of biological specimens for genetic or molecular analysis in the current trial and for future use in ancillary studies, if applicable                                                                                      | _____NA_____        |
| 36 |                               |     |                                                                                                                                                                                                                                                                                     |                     |
| 37 |                               |     |                                                                                                                                                                                                                                                                                     |                     |

\*It is strongly recommended that this checklist be read in conjunction with the SPIRIT 2013 Explanation & Elaboration for important clarification on the items. Amendments to the protocol should be tracked and dated. The SPIRIT checklist is copyrighted by the SPIRIT Group under the Creative Commons [“Attribution-NonCommercial-NoDerivs 3.0 Unported”](https://creativecommons.org/licenses/by-nc-nd/3.0/) license.
